1 **Running title:** Subsidies by livestock in aquatic ecosystems

2

3 **Livestock as vectors of organic matter and nutrient loading in aquatic**  
4 **ecosystems in African savannas**

5

6 Jacob O. Iteba<sup>1</sup>, Thomas Hein<sup>1,2</sup>, Gabriel A. Singer<sup>3,4</sup> and Frank O. Maseke<sup>3,5,6, #</sup>

7 <sup>1</sup>Department of Hydrobiology and Aquatic Ecosystem Management, University of Natural  
8 Resources and Life Sciences, Vienna, Gregor-Mendel-Str. 33, A – 1180 Vienna, Austria

9 <sup>2</sup>WasserCluster Lunz, Lunz am See, Austria

10 <sup>3</sup>Leibniz-Institute of Freshwater Ecology and Inland Fisheries (IGB), Berlin, Germany.

11 <sup>4</sup>Department of Ecology, University of Innsbruck, Technikerstrasse 25, Innsbruck, Austria.

12 <sup>5</sup>Department of Fisheries and Aquatic Sciences, University of Eldoret, P.O. Box 1125-30100  
13 Eldoret, Kenya.

14 <sup>6</sup>Aquatic Science and Ecosystems Group, University of KwaZulu-Natal, Scottsville,  
15 Pietermaritzburg, South Africa.

16

17 <sup>#</sup>Corresponding Author: [f.maseke@gmail.com](mailto:f.maseke@gmail.com), [fmaseke@uoeld.ac.ke](mailto:fmaseke@uoeld.ac.ke)

18 **Abstract**

19 Populations of large wildlife have declined in many landscapes around the world, and have  
20 been replaced or displaced by livestock. The consequences of these changes on the transfer  
21 of organic matter (OM) and nutrients from terrestrial to aquatic ecosystems are not well  
22 understood. We used behavioural data, excretion and egestion rates and C: N: P  
23 stoichiometry of dung and urine of zebu cattle, to develop a metabolism-based estimate of  
24 loading rates of OM (dung), C, N and P into the Mara River, Kenya. We also directly  
25 measured the deposition of OM and urine by cattle into the river during watering. Per head,  
26 zebu cattle excrete and/or egest 25.6 g dry matter (DM, 99.6 g wet mass; metabolism) - 27.7  
27 g DM (direct input) of OM, 16.0-21.8 g C, 5.9-9.6 g N, and 0.3-0.5 g P per day into the river.  
28 To replace loading rates OM of an individual hippopotamus by cattle, around 100 individuals  
29 will be needed, but much less for different elements. In parts of the investigated sub-  
30 catchments loading rates by cattle were equivalent to or higher than that of the  
31 hippopotamus. The patterns of increased suspended materials and nutrients as a result of  
32 livestock activity fit into historical findings on nutrients concentrations, dissolved organic  
33 carbon and other variables in agricultural and livestock areas in the Mara River basin.  
34 Changing these patterns of OM and nutrients transport and cycling are having significant  
35 effects on the structure and functioning of both terrestrial and aquatic ecosystems.

36

37 **Keywords:** cattle dung, egestion, excretion, hippopotamus, livestock, organic matter,  
38 nutrient loading, subsidy, water quality

## 39 Introduction

40 Large animals strengthen the linkage between ecosystems by facilitating the movement of  
41 organic matter and inorganic nutrients, often against naturally-established boundaries (1,  
42 2). For instance, when animals spend time in a recipient ecosystem after feeding elsewhere,  
43 they directly contribute carbon and nutrients to that ecosystem through excretion and  
44 egestion (3-5). Similarly, the death of animals can represent a material flux between  
45 ecosystems (6, 7). One of the greatest examples of subsidy transfer by mammals through  
46 carcasses includes “whale falls” when dead whales sink to the seafloor resulting in an  
47 enormous loading of pulsed organic matter and nutrients (8). Another example is the nearly  
48 annual mass drowning of wildebeest (*Connochaetes taurinus*) in the Mara River, East Africa  
49 during the Serengeti-Maasai Mara migrations (7).

50 For landscapes hosting huge populations of large mammalian herbivores (LMH), transfer of  
51 organic matter and nutrients from terrestrial to aquatic ecosystems has been a subject of  
52 great research interest (9-11). These inputs are often judged as negative for water quality,  
53 biodiversity and ecosystem functioning. For instance, increased input of cattle dung into  
54 streams and rivers can cause microbial contamination and eutrophication (12-14). Livestock  
55 activity can also mobilize sediments which, in addition to the fine particulates in excreta, can  
56 increase turbidity in the aquatic ecosystems, which may reduce light penetration and limit  
57 primary production. Similar to livestock, increased turbidity in rivers has also been linked  
58 with the presence of hippos, which also have high levels of loading of organic matter and  
59 nutrients (4, 15), which have been linked with poor water quality, hypoxia, loss of fish and  
60 invertebrate diversity, and altered ecosystem functioning (12, 15, 16). However, terrigenous  
61 materials by native LMH are vital subsidies driving the natural structure and function of

62 riverine ecosystems draining savanna grasslands and grazing areas (7, 17, 18).

63 Consequentially, declining populations of wild LMH in many regions around the world and  
64 their replacement by livestock (19-21) raises questions on the ecological consequences of  
65 such a replacement on the structure and functioning of aquatic ecosystems (22).

66 Similar to wild LMH such as hippopotamus, cattle are mobile consumers capable of moving  
67 resources from savanna grasslands to aquatic systems (4). In addition to direct input by  
68 defecation and urination during watering or crossing (23), attached faeces washes from  
69 cattle feet and disturbance of sediment re-suspends material into the water column (24,  
70 25). Further, livestock can facilitate subsidy transfer by the promotion of soil and riverbank  
71 erosion (11). In how far livestock can replace wildlife as a vector of terrestrial subsidies  
72 depends on the similarity of the subsidy in terms of quantity, quality and timing and  
73 duration (5, 18, 22). These are influenced by several species-specific factors, including body  
74 size, population size and behaviour linked to water (i.e., ontogenetic habitat switch,  
75 migration, feeding) (5, 10). Water-dependent grazers that are obligate drinkers have the  
76 potential to transfer more subsidies than water-independent browsers that visit watering  
77 points only occasionally (26). For livestock, management decisions determine the timing and  
78 duration of interactions with aquatic environments. For instance, paddocking or fencing and  
79 herding restrict access to watering points and, hence, the possibility of egestion or excretion  
80 in aquatic ecosystems (23, 27). In contrast, unrestricted livestock access to watercourses  
81 creates footpaths where nutrients and organic matter are connected to waterbodies  
82 through hydrologic vectors (28, 29).

83 Several studies have quantified inputs of organic matter (dung) and nutrients by either wild  
84 LMH or livestock to disparate aquatic ecosystems (4, 9, 10, 12). For African savannas,

85 available data for some wild LMH (4, 10, 30) contrasts the lack of comparative data for  
86 livestock, even though livestock graze side by side with or have completely replaced wildlife  
87 (20, 31-33). Whether livestock can quantitatively and qualitatively replace wild LMH as  
88 vectors of terrestrial subsidies to aquatic ecosystems is unknown (22). Thus, data-driven  
89 models on nutrient balances in both grazing and farming systems (34) are required to  
90 understand the implications of growing livestock populations on water quality and  
91 ecosystem structure and functioning of streams and rivers.

92 Here, we quantified loading rates of organic matter and nutrients by cattle into an African  
93 savanna river, that supports large populations of both livestock and wild LMH (20, 33, 35).  
94 The objectives were to 1) quantify livestock-mediated subsidies by assessing behaviour in  
95 concert with excretion and egestion across sites with varying densities of cattle, 2) compare  
96 these data with previously reported inputs by hippos (4), and 3) determine the influence of  
97 livestock access (watering points) on water quality.

## 98 **Methods**

99 The research permit for conducting this study was granted by the National Council For  
100 Science, Technology & Innovation, Kenya. The methods for calculating loading rates of  
101 organic matter (OM) and nutrients by livestock and hippos have been borrowed from (4)  
102 (2015) and (22) (2020). However, the (22) (2020) paper only has estimates for organic  
103 matter (dung) for livestock, and here we present data on OM, carbon (C), nitrogen (N) and  
104 phosphorus (P) for both urine and dung. This study also extrapolates the loading estimates  
105 for river-reaches to the catchment scale.

106 **Study area**

107 This study was conducted in the Mara River (MR) basin, Kenya/Tanzania. The Mara River has  
108 its source in the Mau Escarpment in Kenya and drains into Lake Victoria in Tanzania. As the  
109 only perennial river, the Mara River is very important for watering wildlife migrating  
110 between the Serengeti National Park (SNP) in Tanzania and the Maasai Mara National  
111 Reserve (MMNR) in Kenya during the dry season (36). Extensive grasslands in the pastoral  
112 areas adjacent to the river also provide dispersal ranges for resident wildlife (20, 33, 37).

113 In the recent years, the declining wildlife numbers in the SNP-MMNR ecosystem have been  
114 linked to the intensification of land use, expansion of agriculture, sedentarization of once  
115 pastoral communities and diversification of livelihoods (20, 38, 39). The decline in wildlife  
116 numbers is paralleled by growing populations of livestock intruding into protected areas (33,  
117 40). The biomass of livestock as a per cent of total livestock and wildlife biomass recorded  
118 within the MMNR boundaries has increased from an average of 2% in the 1970s to 23% in  
119 the 2000s; over the last decade, livestock biomass has become more than 8 times greater  
120 than that of any resident wildlife species (20).

121 In the Middle Mara and Talek regions, livestock numbers are significantly higher than the  
122 rest of the MR basin (38). These regions are also home to Maasai pastoralists who graze  
123 over 200,000 cattle and higher numbers of sheep and goats in communal lands adjoining  
124 the MMNR and utilize streams and rivers as watering points and crossings (38). In the  
125 communal conservancies outside the MMNR, people graze their livestock in a manner that  
126 allows livestock to co-exist with wildlife (20, 33, 35). This results in a spatial pattern with  
127 hippopotamus inside the MMNR, mixed hippo and livestock (cattle, goats and sheep)  
128 present in areas adjoining the MMNR and only livestock grazing areas further away from the

129 MMNR and conservancies. This spatial distribution reflects the ongoing replacement of  
130 native wildlife with essentially exotic livestock.

### 131 **Study design**

132 The MR basin was divided into 5 regions defined by elevation, catchment land use and  
133 livestock densities; Nyangores, Amala, Middle Mara and Talek River and MMNR (Figure 1).  
134 Sites were selected at livestock watering points in each of the five regions for livestock  
135 (cattle, goats and sheep) census, observation of behaviour and periodicity of interactions  
136 with streams and rivers during the dry season in February-March 2017. Because of logistical  
137 constraints only the Talek Region sites were monitored and sampled for reach-scale effects  
138 of livestock access on water quality and nutrient concentrations during the dry and wet  
139 season in November-December 2017. Figure S1 (supplementary information) provides  
140 context for the discharge of the major rivers during the time of sampling. Sites in the  
141 Nyangores and Amala regions were located in areas with low to medium densities of  
142 livestock (<50 individuals per km<sup>2</sup>) (41) as most of the inhabitants in these regions are also  
143 involved in smallholder mixed agriculture (livestock rearing, cash and subsistence crops such  
144 as tea, maize and potatoes). Sites in the Middle Mara and Talek regions had higher livestock  
145 densities (average of >100 individuals per km<sup>2</sup>) (41) with over 250,000 cattle present all year  
146 round (20, 33, 38, 42). The Middle Mara, Talek and MMNR regions also host over 4000  
147 hippopotami (43). In total 66 sites were selected for the study: 21 sites in the Nyangores, 17  
148 sites in the Amala, 7 sites in the Middle Mara, 16 sites in the Talek and 5 sites in the MMNR.

### 149 **Sampling methods for water quality**

150 Water samples were collected immediately upstream and downstream of livestock watering  
151 points in the Talek region during the dry and wet seasons. A portable meter (556 MPS,  
152 Yellow Springs Instruments, Ohio, USA) was used for measuring temperature, dissolved  
153 oxygen concentration, electrical conductivity and pH *in situ*. Known volumes of river water  
154 were directly filtered (GF/F) into acid-washed HDPE bottles for analysis of nutrients and  
155 dissolved organic carbon (DOC) concentrations. DOC samples were acidified to pH <2 before  
156 further preservation. Replicate filters were used for the measurement of water column  
157 chlorophyll-*a*, total suspended solids (TSS) and particulate organic matter (POM). Sediment  
158 samples were collected using corers (diameter 10 cm) and placed in aluminium envelopes  
159 for analysis of organic matter and nutrients. For benthic chlorophyll-*a* analysis, a known  
160 area of the stone substrate was scraped off and the slurry was then filtered through GF/F  
161 filters. All water and sediment samples were kept at 4 °C during transport to the laboratory  
162 where they were either analyzed immediately or frozen until analysis. All chlorophyll-*a*  
163 samples were wrapped in aluminium foil, transported using a cooler box with ice, and  
164 stored frozen in the laboratory pending analysis. For *in situ* measured variables and  
165 nutrients, sampling was done thrice a day (morning, noon and evening) to capture diel  
166 variation in numbers of cattle. The mean differences in physico-chemical variable and  
167 nutrients between upstream and downstream reaches of watering points and between  
168 morning (no livestock), noon (increased livestock numbers) and evening (reduced livestock  
169 numbers) were used to assess the effects of cattle for selected watering points.

#### 170 **Livestock behaviour and direct loading estimation at watering points**

171 At the observation sites in the Nyangores, Amala and Talek regions, we assessed numbers  
172 and behaviour of livestock during the day from 9:00 am to 18:00 h on a random day in the



173 dry and wet seasons. We recorded the number of livestock visiting a watering point, the  
174 number defecating and/or urinating in or near the river (not all cattle visiting a watering  
175 point or site do so), and the time spent in or near the river. Often enumerators would stand  
176 at a safe distance 10-20 m away from the stream on a raised ground to see all the livestock  
177 in the water. In addition to recording livestock behaviour using a questionnaire, photos and  
178 short videos were used to analyse livestock behaviour and activity for later verification  
179 (Figure 2). Because of large numbers of livestock visiting a watering point in the Talek  
180 region, observations were done by two people per site. Despite the large numbers of  
181 livestock, watering was often done in shifts as not all cattle could drink water at the same  
182 time. Moreover, individual herders arrived at watering points at different times during the  
183 day, and this gave enumerators ample time to count and monitor instream livestock activity.  
184 Because of the low number of cattle visiting watering points in the Nyangores and Amala  
185 regions, one person was able to count and monitor livestock behaviour and activity at the  
186 watering points.

187 At each site, fresh cattle dung from individual on-shore defecation of both adult and sub-  
188 adult cattle were weighed per defecation event. Subsamples of dung were collected for  
189 wet-dry weight conversion and analysis of C:N:P stoichiometry. Because of logistical  
190 constraints, it was not possible to directly measure the volume of urine produced, but we  
191 collected urine samples for measurement of C:N:P stoichiometry. Urine was collected from  
192 livestock early in the morning in bomas before going out for grazing. The collection was  
193 done manually by holding a container against trickling urine from individual cattle. The  
194 average urine volume per urination event was estimated as 0.66 L (see below). The

195 following equation determined the amount of nutrients (C, N and P) and organic matter  
196 input per cattle per day:

197  $\text{Mass of excretion/egestion}_{\text{C,N,P}} = \text{Weight of dung/urine} \times \text{Content of dung/urine}_{\text{C,N,P}}$

198 The average per capita deposition of faeces and urine directly into or near the river were  
199 computed by multiplying average faeces weight or urine volume with the proportion of  
200 actually defecating or urinating individuals. In this study we noted that cattle visit the river  
201 at least once per day, and for loading estimates we only used single visits per cattle head  
202 per day. This decision is based on our livestock movement and herding behavioural data.  
203 For instance, in the upper Nyangores and Amala region livestock rearing is done in  
204 paddocks, and farmers lead their cattle to watering points once a day, usually around noon  
205 to early evening, and return them to the paddocks until the following day. Similar behaviour  
206 was noted in the lower Mara River basin (Talek and MMNR) where herders mostly drove  
207 their livestock to watering points around mid-day hours and returned them back to grazing  
208 grounds far from watering points.

### 209 **Indirect loading estimation based on a metabolism model**

210 In addition to direct loading measurements, we developed a simple metabolic model to  
211 estimate cattle loading rates of organic matter (dung) and nutrients (C, N and P) from dung  
212 and urine deposited by cattle into the Mara River (see Supplementary Information 1), and  
213 compared results with existing estimates of loading rates for hippos in the river (4). We  
214 estimated cattle loading rates of OM, C, N and P as a fraction of daily dry matter intake  
215 (DMI), the proportion of dung (organic matter, OM) egested or excreted, the volume of  
216 urine produced and time spent in the river, and we multiplied the per-cattle loading rate by

217 the cattle population to get the total loading rates for all cattle. We used the average  
218 stoichiometry of cattle faeces and urine for each region to determine the loading rates of C,  
219 N and P from egestion and excretion. We then compared the loading of cattle and  
220 hippopotamus dung in areas of the Mara River where their distributions overlap.

### 221 **Upscaling loading to region-wide subsidy fluxes and comparison with wild LMH**

222 Livestock census data were obtained from the National and County Ministries of Agriculture  
223 and literature to determine densities resident in each of the regions studied. Assuming that  
224 all cattle visit the river only once per day, we then estimated total loading rates in the five  
225 regions by multiplying the per-capita loading rate with cattle population and compared  
226 these with the hippopotamus population in the three regions where their distribution  
227 overlap (Middle Mara River, Talek River and MMNR). Loading estimates for dung and urine  
228 were translated and integrated to total subsidy fluxes of C, N and P using their respective  
229 stoichiometries (see below). Data on livestock were obtained from the Ministry of  
230 Agriculture and Kenya National Bureau of Statistics reports (44-47). Livestock and wildlife  
231 (hippos) data were also obtained from unpublished and published survey reports (20, 33,  
232 38, 42, 43, 48).

### 233 **Laboratory analyses**

234 **Water samples:** Dissolved nutrient fractions including total dissolved nitrogen (TDN),  
235 soluble reactive phosphorus (SRP), nitrates ( $\text{NO}_3^-$ ), and ammonium ( $\text{NH}_4^+$ ) were analysed  
236 from filtered water samples, while unfiltered water was used for total phosphorus (TP) and  
237 total nitrogen (TN) analysis [24]. TP, TN and SRP were determined using standard

238 colourimetric methods.  $\text{NO}_3^-$  was analysed using the salicylate method and  $\text{NH}_4^+$  was  
239 analysed using the reaction between sodium salicylate and hypochlorite solutions. Dissolved  
240 organic carbon (DOC) and total dissolved nitrogen (TDN) concentrations were determined  
241 using a Shimadzu TOC-V-CPN. TSS and POM (as ash-free dry mass after combustion at  $450^\circ\text{C}$   
242 for 4 hours) were determined gravimetrically (49). Chlorophyll-*a* was extracted from the  
243 GF/F filters using 90% acetone solution and assessed spectrophotometrically at the  
244 University of Eldoret (49).

245 **Nutrients in sediments:** TN and TP were determined colourimetrically after acid digestion of  
246 oven-dried samples. Colourimetric procedures were applied for the analysis of  $\text{NO}_3^-$  and  
247  $\text{NH}_4^+$  from wet sediments after extraction using 0.5M  $\text{K}_2\text{SO}_4$ . Inorganic phosphorous  
248 concentration was determined using extraction after Olsen with 0.5 M sodium bicarbonate  
249 at pH 8.5 (50).

250 **Stoichiometry of dung and urine:** Dung samples were analysed for C, N and P content. For C  
251 and N, dried ( $60^\circ\text{C}$  for 48h) samples were grounded, weighed and loaded into tin cups, and  
252 analysed on an elemental analyser (Hekatech-Elemental analyser, Thermo Finnigan). For P,  
253 samples were weighed, ashed in a muffle furnace at  $550^\circ\text{C}$  and analyzed following the  
254 persulfate digestion method (51). Because of logistical constraints, samples were collected  
255 from the Talek region only for analysis of C, N and P in the urine. The urine samples were  
256 analysed for total dissolved nitrogen (TDN), total dissolved phosphorus (TDP) and dissolved  
257 organic carbon (DOC).

258 **Data analysis**

259 Non-parametric, rank-based H-tests (Kruskal-Wallis ANOVAs) was used to test for  
260 differences in stream size (width, depth and discharge) at the various watering points  
261 (sampling sites) in the Amala, Nyangores and Talek rivers (regions). We also used K-H  
262 ANOVA to compare C: N: P stoichiometry of cattle dung among regions. Significant H-tests  
263 were followed by Tukey multiple comparisons as *post hoc* tests.

264 We used generalized additive mixed modelling (GAMM) to test for spatial and seasonal  
265 variation in livestock characteristics (number of livestock and percentage of individuals  
266 defecating and urinating in the river per herd) using the *mgcv* package in R (52, 53). Before  
267 GAMMs count data were log-transformed while percentage data were logit-transformed.  
268 For each response variable, the GAMM model included river (Amala, Nyangores and Talek)  
269 and season (dry and wet) as fixed effects, and watering point (sampling site) as a random  
270 effect to test whether site location influenced livestock characteristics. We included river  
271 and its interaction with the season (river X season) as fixed factors. We fit an initial GAMM  
272 'full' model that included river and season as fixed effects, and 'watering point' as a random  
273 effect. To identify the most parsimonious model we used a step-wise approach based on  
274 the Akaike Information Criterion (AIC) to achieve an optimal model (54).

275 We used bootstrap analysis (k =10,000 with replacement) to estimate 95% confidence  
276 intervals (CIs) for livestock characteristics data using the *boot* package in R (55).  
277 Bootstrapping is a resampling method used for estimating a distribution, from which various  
278 measures of interest can be calculated (e.g., mean, standard error and CIs) (56-58). We used  
279 paired t-tests to compare *in situ* water variables, concentrations of chlorophyll-*a*, organic  
280 matter, dissolved organic carbon and nutrients between upstream and downstream  
281 locations at livestock watering points.

282

## 283 **Results**

### 284 **Cattle behaviour**

285 There were seasonal differences in stream size at watering points brought about by  
286 increases in discharge during the wet season (Table 1). The Amala and Nyangores regions  
287 had lower numbers of cattle visiting watering points than the Talek region (Figure 3). The  
288 median number of cattle per herd in the Nyangores and Amala was 4 and herd size ranged  
289 from 1 to 14 in Nyangores and 1 to 18 in Amala, while in the Talek the median was 50, with  
290 a range from 4 to 2100. In the Talek, two herds were quite large at 1500 and 2100  
291 individuals and were the only ones with numbers over 600, with the third-highest herd  
292 having 530 individuals. There were no significant spatial and seasonal differences in time  
293 spent by cattle in the river, and the percentage of cattle per herd that defecated or urinated  
294 in the river (Figure 3, Table 2).

295 The bootstrap data and 95 confidence intervals (CIs) for livestock characteristics and C, N  
296 and P composition of cattle dung and urine are presented in Table S1 (supplementary  
297 information). The median time spent by cattle at watering points was 11.5 minutes, and the  
298 95% CIs were 10.6 and 12.5 minutes (Figure 3). Across the MR basin slightly more cattle  
299 urinated (bootstrap median = 13.6%) than defecated (bootstrap median = 12.4%) in the  
300 river. The bootstrap CIs for defecation and urination were 11.3-13.6% and 12.2-14.9%,  
301 respectively. The median dung weight was 868.5 g, and the 95% CIs were 749.8 g and 991.1  
302 g. The median urine volume was 0.788 L, and the 95% CIs were 0.611 L and 0.965 L.

303

### 304 **Loading rates by cattle**

305 There was a significant difference in the C: N: P stoichiometry (quality) of cattle dung among  
306 regions (Table 3). The Nyangores and Amala regions recorded the highest quality (lower C:  
307 N and C: P ratios) of cattle dung loaded into rivers, while the lower MR basin (Talek and  
308 MMNR) recorded the poorest quality (highest C: N ratio). Cattle dung had a lower C: N and  
309 C:P ratio (higher quality) than hippo dung (Table 3). On average, the composition of cattle  
310 dung was  $32.6 \pm 4.2\%$  C,  $1.4 \pm 0.3\%$  N and  $0.29 \pm 0.07\%$  P, while that of urine was  $14.2 \pm 2.7\%$  C,  
311  $10.3 \pm 1.2\%$  N and  $0.43 \pm 0.13\%$  P. Cattle dung and urine had a stoichiometry of 113.2 C: 4.9 N:  
312 1.0 P and 33.2 C: 23.9 N: 1.0 P, respectively. Overall stoichiometry by mass of cattle  
313 excretion/ egestion in the MR basin was 57.2 C: 19.3 N: 1.0 P.

314 Based on metabolic considerations, we estimate that cattle in the MR basin had a daily  
315 intake of 25 g dry matter (DM)  $\text{kg}^{-1}$  in the dry season and 19 g DM  $\text{kg}^{-1}$  in the wet season.  
316 This translates to an egestion of 10.5 g DM  $\text{kg cattle}^{-1}\text{day}^{-1}$  in the wet season, and 13.8 g DM  
317  $\text{kg cattle}^{-1}\text{day}^{-1}$  in the dry season. Assuming that cattle consumption is averaged over 6  
318 months of the wet season and 6 months of the dry season and that they spend 11.5 minutes  
319 in the river per day, we estimated that individual cattle with a body mass of 265 kg loads  
320 25.6 g DM  $\text{kg day}^{-1}$  into the river. With a wet-dry mass conversion of 25.7%, we estimated  
321 that per head, 99.6 g (wet mass) of OM (dung) is loaded into rivers per day. Per capita, cattle  
322 defecate 12.5 kg faeces (wet mass) every day, and 0.0996 kg (0.7%) of that goes into the  
323 Mara River. Assuming an average daily urine volume of 6.63 L and a time of 11.5 minutes  
324 spent in or near the river, we estimate a daily per capita urine volume deposited in or near  
325 the river of 0.053 L.

326 Direct observations of defecation yielded an average of  $868.5 \pm 7.9$  g wet mass (223.2 g DM)  
327 of dung per defecation event, and this enters the river every time cattle defecates in or near  
328 the river. Since out of a herd of cattle that visit a watering point, on average only 12.4%  
329 defecate, this translates to per capita faeces (wet mass) deposition in or near rivers of 107.7  
330 g, which is marginally higher than the estimate of 99.6 g faeces based on metabolic  
331 considerations. Further, 13.6% of the herd were observed to urinate during the visits to  
332 watering points. Assuming a volume of 6.63 L per single urination event, this translates to a  
333 per capita urine loading of 0.090 L. This estimate is based on the number of observed  
334 urination events (10) per day and their average volume, which is 70% higher than the  
335 estimate based on fractional time spent near the watering point and the daily urine  
336 production.

337 We used only the metabolism-based loading estimates for further computation of C, N and  
338 P fluxes upscaled to region-wide estimates. The motivation behind this choice is for better  
339 comparability with the previously published hippo-driven fluxes, which were achieved using  
340 the same methodology, and ease of gaining further data in future projects.

341 Based on metabolism model, per capita cattle added 99.6 g wet mass (25.6 g DM) of OM,  
342 8.4 g C, 0.4 g N and 0.07 g P through egestion, and 7.6 g C, 5.5 g N and 0.23 g P through  
343 excretion into the Mara River per day (Table 4). The overall loading of waste (excretion +  
344 egestion) per cattle per day into the Mara River was 99.6 g OM (wet mass), 16.0 g C, 5.9 g N,  
345 and 0.3 g P per day (Table 4).

346 **Cattle as a replacement for wildlife**



347 Using the metabolism method, specific C: N: P stoichiometry of cattle and hippo dung per  
348 region and cattle population numbers, we estimated total daily loading of organic matter  
349 (OM) for the cattle population in the MMNR to be 1,157 kg. In the Middle Mara and Talek  
350 regions, the loading rates for OM were estimated to be 2,599 and 7,364 kg faeces (wet  
351 mass), respectively (Table 5). In comparison, total daily loading of OM by the hippopotamus  
352 population in the MMNR, Middle Mara and Talek Region, is estimated to be 16,739 kg,  
353 13,668 kg and 5,638 kg faeces (wet mass), respectively (4). Thus, within the MMNR,  
354 livestock loading with OM is only 7% of loading originating from hippos, but in the Middle  
355 Mara and Talek Region, the loading by cattle increases to 19% and 131%, respectively. These  
356 numbers describing the effects of replacing wildlife by livestock change markedly when the  
357 differences of cattle vs. hippos concerning wet-dry conversion factors for dung and  
358 stoichiometry of egestion and excretion are taken into account. Daily loading of C, N and P  
359 due to the cattle in the MMNR represents 12.1% C, 29.5% N and 15.8% P of the loading  
360 achieved by hippopotamus (Table 5). These relative loading rates for cattle vs. hippos  
361 increase to 31.8% C, 80.9% N and 43.6% P in the Middle Mara region, and to 224.6% C,  
362 556.7% N and 274.4% P in the Talek region. Overall, regarding OM loading, one hippo  
363 corresponds to the loading of 100 individuals of cattle, while for C, N and P loading it  
364 corresponds to an equivalent of 59, 24 and 44 cattle, respectively.

365 Loading rates for OM and nutrients were also estimated per unit area of the river. Using the  
366 average widths of the Mara River and its major tributary the Talek River in its lower section  
367 (20 and 10 m, respectively), on average cattle load a total of 457.5 g DM, 75.8 g C, 26.6 g N  
368 and 1.4 g P m<sup>-2</sup> year<sup>-1</sup> into riverine habitats of the lower MR basin (Mara River, lower Talek  
369 and Olare-Orok tributaries). Along the upper Talek River where livestock densities are very

370 high, cattle loading increases by >100% to 1193.6 g DM, 199.1 g C, 69.5 g N, and 3.6 g P m<sup>-2</sup>  
371 year.

### 372 **Livestock effects on water quality**

373 Downstream locations of livestock watering points recorded significantly higher TSS and  
374 POM concentrations compared to upstream locations (paired t-test,  $p < 0.05$ , Table 6).  
375 However, no significant differences were noted for temperature, DO, EC, TDS, pH, water  
376 column chlorophyll-*a* and benthic chlorophyll-*a*. For nutrients in the water column, mean  
377 concentrations were higher downstream, but only significantly for TP, TN and TDN, with  
378 relevant increases of 54% and 44% for N fractions, respectively. Differences between  
379 upstream and downstream locations were more pronounced for nutrients in the sediments,  
380 with nitrate showing the highest increase of 60% (Table 6). To capture the direct effects of  
381 livestock presence on water quality, differences in diel (morning, noon/mid-day and  
382 evening) levels of physico-chemical variables and concentrations of nutrients were used  
383 (Figure 4 and 5). As expected, we recorded higher mean water temperature and lower  
384 dissolved oxygen concentrations, but no differences in electrical conductivity, total  
385 dissolved solids and salinity (Figure 4). However, there were clear diel changes in nutrient  
386 concentrations occasioned by the presence of livestock at the watering points (Figure 5).  
387 For instance, nitrates, ammonia and soluble reactive phosphorus concentrations were  
388 higher during mid-day than the rest of the times (morning and evening), and for most  
389 nutrients, downstream concentrations were higher than upstream concentrations (Figure 5).

### 390 **Discussion**

### 391 **Loading of livestock and hippos**

392 Our findings show that cattle are major agents for the transfer of organic matter, carbon  
393 and nutrients (N and P) from terrestrial to aquatic environments in African savannas and  
394 grazing areas. On average, an individual zebu cattle contributes 36.4 kg of OM (wet weight)  
395 in the form of dung, 5.8 kg C, 2.2 kg N and 0.11 kg P year<sup>-1</sup> into the Mara River through  
396 excretion and egestion. Given the 1.8 million cattle population in the MR basin, we estimate  
397 total daily loading into the river to be 179.7 metric tons OM (wet mass), 28.3 metric tons C,  
398 10.5 metric tons N and 0.6 metric tons P. In comparison, daily loading by the hippopotamus  
399 population (approximately 4000 individuals) into the river is approximately 36.2 metric tons  
400 OM (wet mass), 3.5 metric tons C, 0.5 metric tons N and 0.05 metric tons P. Cattle inputs of  
401 OM are estimated to range from 7% - 131% of loading relative to hippopotamus loading  
402 rates in areas where their distribution overlap.

403 Arguably, these numbers are first-order estimates as they rely on several assumptions. For  
404 example, a daily visit of hippo to a watercourse is guaranteed but may be doubted for cattle.  
405 Also, it is estimated that livestock watering in the river occurs only once during the day, but  
406 cattle are sometimes watered or cross the river twice when leaving for grazing and  
407 returning to bomas (livestock sheds or enclosures) in the evening. There is significant spatial  
408 and temporal variation in loading rates as a result of spatial variations in cattle densities,  
409 forage availability and quality and distribution of water sources and distance covered or  
410 time spent foraging. Other factors that influence cattle loading to the river include grassland  
411 productivity, which is highly dependent on seasonal and annual variations in precipitation  
412 and grazing intensity (59).

413 There was spatial variation in the C: N: P stoichiometry of dung across the MR basin with the  
414 upper basin (Nyangores and Amala) having lower C relative to N and P than the lower basin  
415 (Talek region and MMNR) (Table 3). While this may be indicative of changes in forage  
416 composition among regions, it also could be due to differences in grazing regimes. It is  
417 notable that in the agricultural areas (Nyangores, Amala and Upper Mara) where mixed crop  
418 and livestock farming is practised, livestock feed on other types of forage other than pasture  
419 (grass), such as Napier grass and maize stalks. In comparison, livestock in the Middle Mara,  
420 Talek Region and MMNR mainly forage on savanna grass with limited access to  
421 supplementary feeds. The carbon content of dung can vary strongly due to variation in  
422 organic matter content, feed digestibility and feed quality (C: N: P ratio), thereby also  
423 affecting N and P content. Also, while the small paddocks in the upper MR basin are  
424 intensively grazed and pasture is dominated by fresh shoots of grasses, the middle Mara,  
425 MMNR and Talek regions are mainly composed of tussock that is of poorer quality. Low C: N  
426 ratios in dung, hence in forage (grass) in the upper MR basin could result from accelerated  
427 nutrient cycling or increased nutrient availability induced by livestock faeces and urine (60)

428 Variation in ration digestibility (quality) and protein content can also result in large  
429 variations in nitrogen excretion and egestion (61, 62). The C: N stoichiometry of dung  
430 (range  $18.4 \pm 3.9$  -  $27.2 \pm 4.9$ ) obtained in this study are within ranges reported for African  
431 cattle or some grazers at pasture (63, 64). Low C: N ratio in dung is indicative of high-quality  
432 forage or feeds that are rich in protein, while high C: N and C: P ratios are indicative of low-  
433 quality forage that is typical of savanna grass during the dry season (10). Similar findings of a  
434 high C: N and C: P ratios have also been reported for cattle dung in semi-arid eastern Kenya  
435 (65). Although we did not consider seasonality in our study, the composition of dung and

436 urine can vary substantially between seasons due to differences in feed availability and  
437 quality (66). However, some studies have reported limited or lack of variation in C: N ratio of  
438 dung between seasons in savanna grasslands in Zimbabwe (10).

439 In our study, cattle spent an average of 11.5 minutes, which is 2% of the total observation  
440 time (9:00-18:00 hrs), in or near the river during watering or crossings. In a similar study,  
441 Bond et al. (23) observed that cattle spend approximately 2% and 7% of their time (8:30-  
442 16:00 hrs) in the aquatic environment and riparian zone, respectively. Other studies have  
443 reported less time spent by cattle in or near aquatic environments. Ballard and Krueger (67)  
444 recorded 1%, whilst Haan et al. (68) recorded the duration of in-stream cattle activity to be  
445 1.1%. These differences can be explained by factors such as methodological aspects, herding  
446 and environmental differences among studies. Methodologically, both Ballard and Krueger  
447 (67) and Haan *et al.* (68) used an insufficiently frequent recording interval for observation,  
448 while Bond et al. (2014) used continuous observation as we did in this study. Also, while  
449 cattle were left to roam freely and visit the river or watering points without restrictions,  
450 most of the river visits by cattle in our study are largely decided by herders.

451 Because of differences in cattle stocking densities and C: N: P stoichiometry of dung, the  
452 average areal loading rates we estimated for cattle differed between the upper MR basin  
453 (229.5 g DM, 35.1 g C, 13.5 g N and 0.7 g P m<sup>-2</sup> year<sup>-1</sup>) and the lower MR basin (702.9 g DM,  
454 116.9 g C, 40.9 g N and 2.1 g P m<sup>-2</sup> year<sup>-1</sup>). In the MR basin, the distribution of cattle is not  
455 uniform and some regions, such as the upper MR basin in Nyangores and Amala where  
456 farmers practice mixed crop farming as well as animal husbandry, loading rates are much  
457 lower than to the lower MR basin, where the Maasai pastoralists keep large numbers of  
458 cattle. For both regions, these estimates are lower than estimates for some wild LMH in

459 African savannas. In the Mara River, it has been estimated that hippopotamus loading  
460 amounts to 1229 g DM, 502 g C, 71 g N and 6.9 g P m<sup>-2</sup> year<sup>-1</sup> (4). In the eulittoral zone of a  
461 waterhole in Hwange National Park, Zimbabwe loading by LMH was estimated to be 3157 C,  
462 91 N, and 22 P g m<sup>-2</sup> year<sup>-1</sup> (10). On the other hand, cattle loading values in our study are  
463 higher than estimates in an English Chalk stream, where loading rates through defecation by  
464 33 cattle was 198 g DM, 8.0 g N and 14.7 g P m<sup>-2</sup> year<sup>-1</sup> (9). Differences in loading rates  
465 among animal vectors are largely due to differences in body size, whereby megaherbivores  
466 such as elephants and hippopotamus consume (and transfer) large amounts of terrigenous  
467 vegetation. Some animals spend much more time in and around the river than others, such  
468 as hippopotamus, and this increases the loading of organic matter and nutrients. Loading  
469 rates are also a function of animal populations and their distribution in river networks.

470 Our loading estimates for faeces based on metabolic considerations and direct method  
471 considerably agree, as opposed to estimates for urine (Table 4). The discrepancies in urine  
472 are probably due to relying on literature to estimate urination events per day. Data on  
473 frequencies of urination among African zebu cattle are limited, but the value we used for  
474 daily urinary output (6.63 L per day) for African zebu cattle agrees with zebu Tharparkar  
475 cattle (6.9 L per day) (69), but slightly lower than Nellore zebu cattle (8.1 L per day) (70). It  
476 has also been noted that cattle preferentially defecate and urinate in aquatic environments  
477 (23), which implies that the volume per urination is likely lower during watering than during  
478 other times because the motivation is the trickling stream rather than a full bladder. This  
479 agreement in urinary outputs implies that the frequency of urination and diel variation in  
480 urination volumes probably presents sources of uncertainty in our study. In a review, Selbie  
481 et al. (71) noted that daily urine volume varies widely among different types of cattle, with

482 average volume per urination event ranging from 0.9 L to 20.5 L. Although we estimated ten  
483 (10) urination events in our study, with a range of 8-12 urinations per day (72), these  
484 estimates are from studies conducted in the temperate zone where water intake and  
485 average weights of cattle are likely higher. In semi-arid African savannas, water is limited  
486 during the dry season and this will reduce the intake and excretion rates, including the  
487 frequency of urination.

#### 488 **Livestock influences on water quality**

489 There were significant differences in nutrient concentrations in the water column and  
490 sediments between upstream and downstream of livestock watering points (Table 6).  
491 Elevated concentrations of TSS and POM were also recorded downstream of livestock  
492 watering points in the water column. In a similar study, Bond et al. (9) showed that cattle  
493 access to a river led to instream increase of nitrogen, phosphorus and potassium  
494 concentrations. Through their instream activity, livestock contributes to organic matter and  
495 nutrient input and re-suspension of sediments, therefore elevating turbidity levels in  
496 streams and rivers (13). In many studies, sediment losses from trampled and heavily grazed  
497 stream banks have been reported to exceed those observed for untrampled or ungrazed  
498 counterparts (73).

499 Well researched aspects of livestock effects on aquatic ecosystems have done in large  
500 rangelands North America (e.g., (12, 74) and dairy farms in Australia (e.g., (75) and New  
501 Zealand (e.g. (24) where stock densities, management practices and climatic conditions are  
502 different from African savannas. Moreover, a wide body of research has shown that cattle  
503 access to streams and rivers can have potentially harmful effects on aquatic ecology,

504 geomorphology and water quality. Herding of livestock near the river channels can cause  
505 bank slumping or collapse, releasing significant amounts of sediments (76, 77). These  
506 livestock-induced habitat changes degrade water quality, alter instream habitats and reduce  
507 biodiversity of macroinvertebrates and fishes (13, 78, 79). The most noted effects of stream  
508 degradation caused by livestock activity have been the elimination of sensitive  
509 macroinvertebrate taxa (e.g., Ephemeroptera, Plecoptera and Trichoptera) and the increase  
510 of tolerant species (e.g., Oligochaeta and Chironomidae) (74, 80, 81). Similar effects of  
511 hippopotamus on reduced diversity of macroinvertebrates and fishes in streams and rivers  
512 have also been reported (16, 82).

513 Previous studies in the MR basin have judged sediments and nutrient inputs into streams  
514 and rivers from livestock grazing and agricultural land use as non-point source pollution (83-  
515 85), but other studies have underlined the immediate, local effects of wildlife  
516 (hippopotamus) on suspended sediments, organic matter and nutrient input (15, 18, 86).  
517 We found notable differences in N and P concentrations in the water column and benthic  
518 sediments between the upstream and downstream reaches, with remarkably higher  
519 concentrations in the sediments downstream. This shows that cattle can produce similarly  
520 localized changes in water quality as hippos and thus, contribute to heterogeneity in the  
521 aquatic ecosystem in a similar way as achieved by hippo pools with distinct locations in the  
522 landscape. Watering points in our study were rarely locations of specifically high residence  
523 time that would smooth and potentially amplify a subsidy effect, but still, differences in  
524 water chemistry were noted during different times of the day as a result of direct livestock  
525 activity in the rivers (Figures 4 and 5). Moreover, sediments downstream of livestock  
526 watering points were indicative of a subsidy, likely through their ability to adsorb inputs of P



527 on mineral surfaces and N and P in microbial biomass. These findings are reflective of the  
528 catchment-scale effects of livestock grazing and hippo populations on water quality in the  
529 Mara River and its tributaries. Historical data from different sites have shown that high  
530 livestock and hippo densities are associated with elevated levels of nutrients, dissolved  
531 organic carbon and electrical conductivity (Table S2). These findings fit into previous  
532 published results on the influence of livestock and other farming practices (including mixed  
533 crop framing and livestock rearing) on water quality in the Mara River basin (81, 83-85). In  
534 this study, we note that water quality effects were revealed even for relatively minor  
535 watering points attracting 40-100 cattle daily.

#### 536 **Broad implications of this study**

537 This research increases our knowledge about the amount of resource subsidies cattle can  
538 transfer from terrestrial into aquatic ecosystems in savanna landscapes, and how these  
539 amounts compare with those of large wildlife. As elsewhere, the remaining populations of  
540 wild LMH in African savannas and grasslands are only a fraction of the large numbers that  
541 were once key features of these landscapes but have been decimated by human  
542 settlements, agricultural activities and replacement by livestock (32, 33). Given the critical  
543 role that wild LMH have played for millennia connecting aquatic ecosystems with their  
544 terrestrial surroundings, there is concern that this important ecological role may be lost.  
545 Alternatively, livestock may provide a functional replacement for LMH, thereby maintaining  
546 large-scale ecological mechanisms crucial for savannas.

547 Quantitatively, our study shows that a one-on-one replacement of loading by wild LMH,  
548 especially hippopotamus, by cattle is unlikely. Per capita loading of OM, C, N and P by small-

549 bodied Zebu cattle is much lower than loading by the mega hippopotamus. However, our  
550 results show that larger cattle populations can create substantial terrestrial-aquatic subsidy  
551 fluxes. Even with increasing numbers of livestock, the nature of their distribution and  
552 behaviour implies that considerable livestock management would be needed to achieve  
553 effects per unit area that are comparable to replaced wildlife. For instance, cattle visit  
554 watering points only for a short period (11 minutes) compared to 12 h for hippopotamus.  
555 Cattle are also distributed throughout the entire area, distributing faeces and urine over a  
556 large area in comparison with hippopotamus that resides in groups in specific pools.  
557 Nevertheless, herders determine movements and interactions with water sources and  
558 livestock management recommendations could be guided along with ideas of ecological  
559 replacement keeping alive the functioning of a landscape, rather than guidance by the  
560 simplified objective of maintaining unnatural good water quality.

561 A particular challenge of such efforts exists in the many differences in physiology, foraging  
562 behaviour and body sizes between livestock and wildlife, which have a strong bearing on the  
563 composition of their material subsidies, and consequently their influence on ecosystem  
564 processes. Ruminants such as cattle, goats and sheep have a relatively efficient digestive  
565 system compared to non-ruminants such as hippos and elephants, and this difference in  
566 digestion produces smaller fecal particle sizes in ruminants (87). However, non-ruminants  
567 have longer mean retention times than ruminants, which enhances nutrient extraction from  
568 ingesta compared to ruminants. For instance, the overall C: N: P stoichiometry of cattle  
569 dung in this study is 113.8: 4.9: 1.0, while that of the hippopotamus is 249.8: 5.9: 1.0. With  
570 most of the large wildlife being replaced by ruminants such as cattle, sheep and goats (20,  
571 33, 88), there is potential for a shift in the functioning of aquatic ecosystems as a result of

572 changes in the quality and quantity of subsidies they are receiving. For instance, the  
573 differences in the quality of inputs between livestock (mainly ruminants) and hippopotamus  
574 (non-ruminants) have been found to produce differences in ecosystem responses, with  
575 cattle transferring higher amounts of limiting nutrients (N and P), major ions, and dissolved  
576 organic carbon to aquatic ecosystems relative to hippopotamus (22). The higher quality  
577 (lower C: N: P ratio) of cattle vs hippo dung has been observed to promote higher primary  
578 production in both the benthos and in the water column (22). On the other hand, the larger  
579 particles of hippo dung tend to sink to the bottom of aquatic ecosystems where they  
580 smother and reduce benthic production (15, 18, 89). Thus, replacement of wildlife  
581 (hippopotamus) by livestock (mainly cattle) will likely stimulate more algal production than  
582 the heterotrophic component (bacteria/fungi), and hence shift aquatic ecosystem towards  
583 autotrophy.

## 584 **Conclusions**

585 With large wildlife in decline and livestock (cattle, goats and sheep) numbers increasing in  
586 the African savannas and elsewhere, the quantity and quality of dung being produced will  
587 increasingly become a determinant factor on ecosystem productivity and function. Cattle  
588 and hippopotamus differ in the amount of organic matter and nutrients they transfer into  
589 the aquatic environment. Cattle dung and hippo dung also differ in where they are initially  
590 deposited on the landscape, with 50% of hippo dung often deposited directly into the river  
591 or on the riverbank, while only 0.7% of cattle dung is deposited in the river. Changing these  
592 patterns of organic matter transport and cycling will have significant effects on the structure  
593 and functioning of both terrestrial and aquatic ecosystems.

594 **Data Availability**

595 The data underlying this paper have been submitted the data to the Dryad repository with  
596 the following DOI: <https://doi.org/10.5061/dryad.d2547d82z>.

597 **Acknowledgements**

598 We are grateful to Gilbert Geemi, Decla Chemutai and Evans Ole Keshe for assistance during  
599 field data collection. We are grateful to Henry Lubanga and Augustine Sitati for assistance  
600 with sample analysis at the University of Eldoret. We acknowledge Sylvia Ortmann (Leibniz  
601 Institute for Zoo and Wildlife Research) for additional chemical analysis of hippo and cattle  
602 dung samples. This work was supported by the International Foundation for Science  
603 (Research Grant No. A/5810-1); an Alexander von Humboldt Postdoc fellowship to FOM; and  
604 an Austrian Development Cooperation fellowship for MSc to JOI.

605

606 **Author contributions**

607 JI designed the study, collected field data, performed data analysis and drafted the  
608 manuscript. TH designed the study and critically revised the manuscript; GS designed the  
609 study, performed data analysis and critically revised the manuscript; FM conceived the  
610 study, collected field data, performed data analysis and critically revised the manuscript. All  
611 authors gave final approval for publication and agree to be held accountable for the work  
612 performed therein.

613

614 **Figure Legends**

615 Figure 1: Map of the study area showing the location of the livestock study sites in the four  
616 regions in the Mara River Basin, Kenya. The MMNR sites are within the Maasai Mara  
617 National Reserve.

618 Figure 2. Livestock watering points during monitoring of behaviour in the upper Mara River  
619 Basin (a, b and c) and lower basin in the Talek Region (d, e and f) during the wet (a, b and c)  
620 and dry (c, e and f) seasons.

621 Figure 3. Livestock behaviour (time spent in the watering points, number of cattle per herd,  
622 % defecation and % urination) in the upper Mara River Basin and lower basin in the Talek  
623 region during the wet and dry seasons.

624 Figure 4. Changes in *in-situ* physico-chemical parameters during different times of the day at  
625 livestock watering points in the Mara River basin, Kenya. The different times correspond to  
626 diel (morning, noon/mid-day and evening) variation in the number of livestock visiting  
627 watering points.

628 Figure 5. Changes in nutrient concentrations during different times of the day at livestock  
629 watering points in the Mara River basin, Kenya. The different times correspond to diel  
630 (morning, noon/mid-day and evening) variation in the number of livestock visiting watering  
631 points.

632 **S1 Figure. Time series of discharge data for the major tributaries of the Mara River, Kenya,**  
633 **at the 1LB02 Gauging Station on the Nyangores River (upper panel) and at the 1LA03**  
634 **Gauging Station on Amala River (lower panel). The red horizontal line on the figures**  
635 **indicated the study period.**

636 **S1 Table: Bootstrap medians and 25% and 95% confidence intervals for cattle**  
637 **characteristics and proportions of C, N and P in dung and urine in the Mara River basin,**  
638 **Kenya.**

639 **S2 Table. Differences in density of cattle and hippopotamus, and physico-chemical**  
640 **characteristics (mean  $\pm$  SD) across different sites in the Mara River, Kenya, grouped into**  
641 **five categories: Forested, Agricultural, low density (LD) livestock (mainly cattle), high**  
642 **density (HD) livestock, and hippopotamus (hippos). The statistics are for one-way ANOVA**  
643 **used to analyse significant differences in physical and chemical variables and nutrient**  
644 **concentrations across the five site categories in the Mara River basin, Kenya.**

645

646

## 647 **References**

- 648 1. Polis GA, Anderson WB, Holt RD. Toward an integration of landscape and food web ecology:  
649 the dynamics of spatially subsidized food webs. *Annual review of ecology and systematics*.  
650 1997;28(1):289-316.
- 651 2. Vanni MJ. Nutrient cycling by animals in freshwater ecosystems. *Annual Review of Ecology  
652 and Systematics*. 2002;33(1):341-70.
- 653 3. Naiman RJ, Bilby RE, Schindler DE, Helfield JM. Pacific salmon, nutrients, and the dynamics of  
654 freshwater and riparian ecosystems. *Ecosystems*. 2002;5(4):399-417.
- 655 4. Subalusky AL, Dutton CL, Rosi-Marshall EJ, Post DM. The hippopotamus conveyor belt:  
656 vectors of carbon and nutrients from terrestrial grasslands to aquatic systems in sub-Saharan Africa.  
657 *Freshwater Biology*. 2015;60(3):512-25.
- 658 5. Subalusky AL, Post DM. Context dependency of animal resource subsidies. *Biol Rev Camb  
659 Philos Soc*. 2019;94(2):517-38.
- 660 6. Menninger HL, Palmer MA, Craig LS, Richardson DC. Periodical cicada detritus impacts  
661 stream ecosystem metabolism. *Ecosystems*. 2008;11(8):1306-17.
- 662 7. Subalusky AL, Dutton CL, Rosi EJ, Post DM. Annual mass drownings of the Serengeti  
663 wildebeest migration influence nutrient cycling and storage in the Mara River. *Proceedings of the  
664 National Academy of Sciences*. 2017;114(29):7647-52.
- 665 8. Smith CR. *Bigger is better: the role of whales as detritus in marine ecosystems*. Whales,  
666 whaling and ocean ecosystems: University of California Press Berkeley, CA, USA; 2006. p. 286-301.
- 667 9. Bond T, Sear D, Sykes T. Estimating the contribution of in-stream cattle faeces deposits to  
668 nutrient loading in an English Chalk stream. *Agricultural water management*. 2014;131:156-62.
- 669 10. Hulot FD, Prijac A, Lefebvre J-P, Msiteli-Shumba S, Kativu S. A first assessment of  
670 megaherbivore subsidies in artificial waterholes in Hwange National Park, Zimbabwe. *Hydrobiologia*.  
671 2019;837(1):161-75.
- 672 11. Jacobs SM, Bechtold JS, Biggs HC, Grimm NB, Lorentz S, McClain ME, et al. Nutrient vectors  
673 and riparian processing: A review with special reference to African semiarid Savanna ecosystems.  
674 *Ecosystems*. 2007;10(8):1231-49.
- 675 12. Belsky AJ, Matzke A, Uselman S. Survey of livestock influences on stream and riparian  
676 ecosystems in the western United States. *Journal of Soil and Water Conservation*. 1999;54(1):419-  
677 31.
- 678 13. Meehan WR, Platts WS. Livestock grazing and the aquatic environment. *Journal of Soil and  
679 Water Conservation*. 1978;33(6):274-8.
- 680 14. Strauch AM. Seasonal variability in faecal bacteria of semiarid rivers in the Serengeti  
681 National Park, Tanzania. *Marine and Freshwater Research*. 2011;62(10):1191-200.
- 682 15. Dutton CL, Subalusky AL, Hamilton SK, Rosi EJ, Post DM. Organic matter loading by  
683 hippopotami causes subsidy overload resulting in downstream hypoxia and fish kills. *Nature  
684 Communications*. 2018;9(1):1951.
- 685 16. Stears K, McCauley DJ, Finlay JC, Mpemba J, Warrington IT, Mutayoba BM, et al. Effects of  
686 the hippopotamus on the chemistry and ecology of a changing watershed. *Proceedings of the  
687 National Academy of Sciences*. 2018.
- 688 17. Moore JW, Schindler DE, Carter JL, Fox J, Griffiths J, Holtgrieve GW. Biotic control of stream  
689 fluxes: spawning salmon drive nutrient and matter export. *Ecology*. 2007;88(5):1278-91.
- 690 18. Subalusky AL, Dutton CL, Njoroge L, Rosi EJ, Post DM. Organic matter and nutrient inputs  
691 from large wildlife influence ecosystem function in the Mara River, Africa. *Ecology*.  
692 2018;99(11):2558-74.
- 693 19. Hempson GP, Archibald S, Bond WJ. A continent-wide assessment of the form and intensity  
694 of large mammal herbivory in Africa. *Science*. 2015;350(6264):1056-61.

- 695 20. Ogotu JO, Piepho H-P, Said MY, Ojwang GO, Njino LW, Kifugo SC, et al. Extreme wildlife  
696 declines and concurrent increase in livestock numbers in Kenya: What are the causes? *PloS one*.  
697 2016;11(9):e0163249.
- 698 21. Ripple WJ, Newsome TM, Wolf C, Dirzo R, Everatt KT, Galetti M, et al. Collapse of the world's  
699 largest herbivores. *Science Advances*. 2015;1(4).
- 700 22. Masese FO, Kiplagat MJ, Gonzalez-Quijano CR, Subalusky AL, Dutton CL, Post DM, et al.  
701 Hippopotamus are distinct from domestic livestock in their resource subsidies to and effects on  
702 aquatic ecosystems. *Proc Biol Sci*. 2020;287(1926):20193000.
- 703 23. Bond TA, Sear D, Edwards M. Temperature-driven river utilisation and preferential  
704 defecation by cattle in an English chalk stream. *Livestock Science*. 2012;146(1):59-66.
- 705 24. Davies-Colley RJ, Nagels JW, Smith RA, Young RG, Phillips CJ. Water quality impact of a dairy  
706 cow herd crossing a stream. *New Zealand Journal of Marine and Freshwater Research*.  
707 2004;38(4):569-76.
- 708 25. Terry JA, Benskin CMH, Eastoe EF, Haygarth PM. Temporal dynamics between cattle in-  
709 stream presence and suspended solids in a headwater catchment. *Environmental Science: Processes  
710 & Impacts*. 2014;16(7):1570-7.
- 711 26. Western D. Water availability and its influence on the structure and dynamics of a savannah  
712 large mammal community. *African Journal of Ecology*. 1975;13(3-4):265-86.
- 713 27. Hooda P, Edwards A, Anderson H, Miller A. A review of water quality concerns in livestock  
714 farming areas. *Science of the total environment*. 2000;250(1-3):143-67.
- 715 28. Pionke HB, Gburek WJ, Sharpley AN. Critical source area controls on water quality in an  
716 agricultural watershed located in the Chesapeake Basin. *Ecological Engineering*. 2000;14(4):325-35.
- 717 29. Thompson J, Doody D, Flynn R, Watson C. Dynamics of critical source areas: does  
718 connectivity explain chemistry? *Science of the Total Environment*. 2012;435:499-508.
- 719 30. Naiman RJ, Rogers KH. Large animals and system-level characteristics in river corridors.  
720 *BioScience*. 1997;47(8):521-9.
- 721 31. du Toit JT. Large herbivores and savanna heterogeneity. The Kruger experience: Ecology and  
722 management of savanna heterogeneity. 2003:292-309.
- 723 32. Prins HHT. Competition Between Wildlife and Livestock in Africa. In: Prins HHT, Grootenhuys  
724 JG, Dolan TT, editors. *Wildlife Conservation by Sustainable Use*. Dordrecht: Springer Netherlands;  
725 2000. p. 51-80.
- 726 33. Veldhuis MP, Ritchie ME, Ogotu JO, Morrison TA, Beale CM, Estes AB, et al. Cross-boundary  
727 human impacts compromise the Serengeti-Mara ecosystem. *Science*. 2019;363(6434):1424-8.
- 728 34. Stroosnijder L, de Ridder N, Kiepe P. 4.3 Nutrient Balances in Sahelian Villages. 2001.
- 729 35. Kanga EM, Ogotu JO, Piepho H-P, Olf H. Hippopotamus and livestock grazing: influences on  
730 riparian vegetation and facilitation of other herbivores in the Mara Region of Kenya. *Landscape and  
731 Ecological Engineering*. 2013;9(1):47-58.
- 732 36. Thirgood S, Mosser A, Tham S, Hopcraft G, Mwangomo E, Mlengeya T, et al., editors. Can  
733 parks protect migratory ungulates? The case of the Serengeti wildebeest. *Animal Conservation  
734 forum*; 2004: Cambridge University Press.
- 735 37. Stelfox JG, Peden DG, Epp H, Hudson RJ, Mbugua SW, Agatsiva JL, et al. Herbivore dynamics  
736 in southern Narok, Kenya. *The Journal of wildlife management*. 1986:339-47.
- 737 38. Lamprey RH, Reid RS. Expansion of human settlement in Kenya's Maasai Mara: what future  
738 for pastoralism and wildlife? *Journal of Biogeography*. 2004;31(6):997-1032.
- 739 39. Ottichilo WK, De Leeuw J, Skidmore AK, Prins HH, Said MY. Population trends of large  
740 non-migratory wild herbivores and livestock in the Masai Mara ecosystem, Kenya, between 1977  
741 and 1997. *African journal of Ecology*. 2000;38(3):202-16.
- 742 40. Butt B, Shortridge A, WinklerPrins AM. Pastoral herd management, drought coping  
743 strategies, and cattle mobility in southern Kenya. *Annals of the Association of American  
744 Geographers*. 2009;99(2):309-34.



- 745 41. Metobwa OGM, Mourad KA, Ribbe L. Water demand simulation using WEAP 21: a case study  
746 of the Mara River Basin, Kenya. *Int J Nat Resour Ecol Manag*. 2018;3(1):9-18.
- 747 42. Ogutu JO, Owen-Smith N, Piepho HP, Said MY. Continuing wildlife population declines and  
748 range contraction in the Mara region of Kenya during 1977–2009. *Journal of Zoology*.  
749 2011;285(2):99-109.
- 750 43. Kanga EM, Ogutu JO, Olff H, Santema P. Population trend and distribution of the Vulnerable  
751 common hippopotamus *Hippopotamus amphibius* in the Mara Region of Kenya. *Oryx*.  
752 2011;45(1):20-7.
- 753 44. Data KO. Livestock population by type and district. 2014.
- 754 45. Kenya F. Central Bank of Kenya, Kenya National Bureau of Statistics, FinAccess Household  
755 Survey 2015. Harvard Dataverse. 2016;4.
- 756 46. Statistics KNBo. Basic Report on Well-being in Kenya: Based on Kenya Integrated Household  
757 Budget Survey, 2005/06: Kenya National Bureau of Statistics; 2007.
- 758 47. Statistics KNBo. Kenya economic survey. 2018.
- 759 48. Kiambi S, Kuloba B, Kenana L, Muteti D, Mwenda E. Wet season aerial count of large  
760 herbivores in masai mara national reserve and the adjacent community areas (June 2010). Narok:  
761 Mara Research Station, Kenya Wildlife Service. 2012.
- 762 49. Federation WE, Association APH. Standard methods for the examination of water and  
763 wastewater. American Public Health Association (APHA): Washington, DC, USA. 2005.
- 764 50. Okalebo JR, Gathua KW, Woomer PL. Laboratory methods of soil and plant analysis: a  
765 working manual second edition. Sacred Africa, Nairobi. 2002;21.
- 766 51. APHA. Standard Methods for the Examination of Water and Wastewater. Washington, D.C.:  
767 APHA-AWWA-WEF; 1998.
- 768 52. Team RC. R: A language and environment for statistical computing (Version 3.4. 2)[Computer  
769 software]. Vienna, Austria: R Foundation for Statistical Computing. 2019.
- 770 53. Wood S, Wood MS. Package ‘mgcv’. R package version. 2015:1-7.
- 771 54. Zuur A, Ieno EN, Smith GM. Analyzing ecological data: Springer Science & Business Media;  
772 2007.
- 773 55. Canty AJ. Resampling methods in R: the boot package. *The Newsletter of the R Project*  
774 Volume. 2002;2:3.
- 775 56. Chernick MR. Bootstrap methods: A guide for practitioners and researchers: John Wiley &  
776 Sons; 2011.
- 777 57. Davison AC, Hinkley DV. Bootstrap methods and their application: Cambridge university  
778 press; 1997.
- 779 58. Efron B. Bootstrap methods: another look at the jackknife. *Breakthroughs in statistics*:  
780 Springer; 1992. p. 569-93.
- 781 59. Seagle SW, McNaughton S. Simulated effects of precipitation and nitrogen on Serengeti  
782 grassland productivity. *Biogeochemistry*. 1993;22(3):157-78.
- 783 60. Bai Y, Wu J, Clark CM, Pan Q, Zhang L, Chen S, et al. Grazing alters ecosystem functioning and  
784 C: N: P stoichiometry of grasslands along a regional precipitation gradient. *Journal of Applied*  
785 *Ecology*. 2012;49(6):1204-15.
- 786 61. Külling D, Menzi H, Kröber T, Neftel A, Sutter F, Lischer P, et al. Emissions of ammonia,  
787 nitrous oxide and methane from different types of dairy manure during storage as affected by  
788 dietary protein content. *The Journal of Agricultural Science*. 2001;137(2):235-50.
- 789 62. Snijders P, Wouters B. Livestock and Soil Nutrient Management. Contribution to the  
790 Development of a Curriculum for Farmer Field Schools on Integrated Nutrient Management in East  
791 Africa. Animal Sciences Group, Wageningen University Research, Wageningen, The Netherlands.  
792 2003.
- 793 63. Sileshi GW, Nhamo N, Mafongoya PL, Tanimu J. Stoichiometry of animal manure and  
794 implications for nutrient cycling and agriculture in sub-Saharan Africa. *Nutrient cycling in*  
795 *agroecosystems*. 2017;107(1):91-105.

- 796 64. Sitters J, Maechler MJ, Edwards PJ, Suter W, Olde Venterink H. Interactions between C: N: P  
797 stoichiometry and soil macrofauna control dung decomposition of savanna herbivores. *Functional*  
798 *Ecology*. 2014;28(3):776-86.
- 799 65. Rufino MC, Rowe EC, Delve RJ, Giller KE. Nitrogen cycling efficiencies through resource-poor  
800 African crop–livestock systems. *Agriculture, ecosystems & environment*. 2006;112(4):261-82.
- 801 66. Powell JM, Pearson RA, Hiernaux PH. Crop–livestock interactions in the West African  
802 drylands. *Agronomy journal*. 2004;96(2):469-83.
- 803 67. Ballard TM, Krueger WC. Cattle and salmon I: Cattle distribution and behavior in a  
804 northeastern Oregon riparian ecosystem. *Rangeland Ecology & Management*. 2005;58(3):267-73.
- 805 68. Haan M, Russell J, Davis J, Morrical D. Grazing management and microclimate effects on  
806 cattle distribution relative to a cool season pasture stream. *Rangeland ecology & management*.  
807 2010;63(5):572-80.
- 808 69. Razdan M, Sharma D, Bhargava P, Chawla M. Utilization of urea and water metabolism by  
809 zebu cattle and buffaloes under tropical conditions. *Journal of Dairy Science*. 1971;54(8):1200-6.
- 810 70. Júnior JS, Rennó L, Valadares Filho S, Paulino M, Detmann E, Menezes G, et al. Evaluation of  
811 collection days and times to estimate urinary excretion of purine derivatives and nitrogen  
812 compounds in grazing Nelore cattle. *Livestock science*. 2018;217:85-91.
- 813 71. Selbie DR, Buckthought LE, Shepherd MA. The challenge of the urine patch for managing  
814 nitrogen in grazed pasture systems. *Advances in agronomy*. 129: Elsevier; 2015. p. 229-92.
- 815 72. Haynes R, Williams P. Nutrient cycling and soil fertility in the grazed pasture ecosystem.  
816 *Advances in agronomy*. 49: Elsevier; 1993. p. 119-99.
- 817 73. Vidon P, Campbell MA, Gray M. Unrestricted cattle access to streams and water quality in till  
818 landscape of the Midwest. *Agricultural water management*. 2008;95(3):322-30.
- 819 74. Braccia A, Voshell JR. Benthic macroinvertebrate responses to increasing levels of cattle  
820 grazing in Blue Ridge Mountain streams, Virginia, USA. *Environmental Monitoring and Assessment*.  
821 2007;131(1):185-200.
- 822 75. Scarsbrook M, Melland A. Dairying and water-quality issues in Australia and New Zealand.  
823 *Animal Production Science*. 2015;55(7):856-68.
- 824 76. Conroy E, Turner J, Rymszewicz A, O'sullivan J, Bruen M, Lawler D, et al. The impact of cattle  
825 access on ecological water quality in streams: Examples from agricultural catchments within Ireland.  
826 *Science of the Total Environment*. 2016;547:17-29.
- 827 77. Trimble SW, Mendel AC. The cow as a geomorphic agent—a critical review. *Geomorphology*.  
828 1995;13(1-4):233-53.
- 829 78. Scrimgeour GJ, Kendall S. Effects of livestock grazing on benthic invertebrates from a native  
830 grassland ecosystem. *Freshwater biology*. 2003;48(2):347-62.
- 831 79. Wohl NE, Carline RF. Relations among riparian grazing, sediment loads, macroinvertebrates,  
832 and fishes in three central Pennsylvania streams. *Canadian Journal of Fisheries and Aquatic Sciences*.  
833 1996;53(S1):260-6.
- 834 80. Horak CN, Assef YA, Miserendino ML. Assessing effects of confined animal production  
835 systems on water quality, ecological integrity, and macroinvertebrates at small piedmont streams  
836 (Patagonia, Argentina). *Agricultural Water Management*. 2019;216:242-53.
- 837 81. Minaya V, McClain ME, Moog O, Omengo F, Singer GA. Scale-dependent effects of rural  
838 activities on benthic macroinvertebrates and physico-chemical characteristics in headwater streams  
839 of the Mara River, Kenya. *Ecological Indicators*. 2013;32:116-22.
- 840 82. Masese FO, Abrantes KG, Gettel GM, Irvine K, Bouillon S, McClain ME. Trophic structure of  
841 an African savanna river and organic matter inputs by large terrestrial herbivores: A stable isotope  
842 approach. *Freshwater Biology*. 2018;63(11):1365-80.
- 843 83. Defersha MB, Melesse AM. Field-scale investigation of the effect of land use on sediment  
844 yield and runoff using runoff plot data and models in the Mara River basin, Kenya. *Catena*.  
845 2012;89(1):54-64.

- 846 84. Kilonzo F, Masese FO, Van Griensven A, Bauwens W, Obando J, Lens PN. Spatial-temporal  
847 variability in water quality and macro-invertebrate assemblages in the Upper Mara River basin,  
848 Kenya. *Physics and Chemistry of the Earth, Parts A/B/C*. 2014;67:93-104.
- 849 85. Masese FO, Salcedo-Borda JS, Gettel GM, Irvine K, McClain ME. Influence of catchment land  
850 use and seasonality on dissolved organic matter composition and ecosystem metabolism in  
851 headwater streams of a Kenyan river. *Biogeochemistry*. 2017;132(1-2):1-22.
- 852 86. Dutton CL, Subalusky AL, Anisfeld SC, Njoroge L, Rosi EJ, Post DM. The influence of a semi-  
853 arid sub-catchment on suspended sediments in the Mara River, Kenya. *PloS one*.  
854 2018;13(2):e0192828.
- 855 87. Fritz J, Hummel J, Kienzle E, Arnold C, Nunn C, Clauss M. Comparative chewing efficiency in  
856 mammalian herbivores. *Oikos*. 2009;118(11):1623-32.
- 857 88. Løvschal M, Håkonsson DD, Amoke I. Are goats the new elephants in the room? Changing  
858 land-use strategies in Greater Mara, Kenya. *Land Use Policy*. 2019;80:395-9.
- 859 89. Dawson J, Pillay D, Roberts PJ, Perissinotto R. Declines in benthic macroinvertebrate  
860 community metrics and microphytobenthic biomass in an estuarine lake following enrichment by  
861 hippo dung. *Scientific reports*. 2016;6:37359.
- 862 Masese, Frank; Iteba, Jacob; Singer, Gabriel; Hein, Thomas (2021), Livestock as vectors of organic  
863 matter and nutrient loading in aquatic ecosystems in African savannas, Dryad,  
864 Dataset, <https://doi.org/10.5061/dryad.d2547d82z>
- 865

866 **Table 1:** Sizes of livestock watering points and total number of cattle that visited watering points in the Mara River Basin, Kenya during the dry  
 867 and wet seasons. Given are mean value  $\pm$  standard deviation, H-test after Kruskal-Wallis ( $***p < 0.001$ ,  $**p < 0.01$ ,  $*p < 0.05$ ), except for  
 868 number of cattle and number of watering points. Lower case superscripted letters indicate significant differences according to Tukey post-hoc  
 869 tests following a significant H-test.

870

| Characteristics               | Nyangores Dry              | Nyangores Wet              | Amala Dry                   | Amala Wet                  | Talek Dry                   | Talek Wet                  | H-test |
|-------------------------------|----------------------------|----------------------------|-----------------------------|----------------------------|-----------------------------|----------------------------|--------|
| Number of watering points     | 21                         | 16                         | 17                          | 13                         | 10                          | 10                         | -      |
| Total number of cattle        | 768                        | 558                        | 795                         | 603                        | 7,836                       | 1576                       | -      |
| River width (m)               | 3.6 $\pm$ 0.9 <sup>a</sup> | 4.3 $\pm$ 0.6 <sup>a</sup> | 3.1 $\pm$ 0.7 <sup>a</sup>  | 4.5 $\pm$ 1.2 <sup>a</sup> | 4.1 $\pm$ 1.0 <sup>a</sup>  | 9.7 $\pm$ 2.4 <sup>b</sup> | 0.097  |
| River depth (m)               | 0.2 $\pm$ 0.1 <sup>a</sup> | 0.2 $\pm$ 0.1 <sup>a</sup> | 0.2 $\pm$ 0.05 <sup>a</sup> | 0.2 $\pm$ 0.1 <sup>a</sup> | 0.1 $\pm$ 0.03 <sup>b</sup> | 0.3 $\pm$ 0.1 <sup>a</sup> | 0.048* |
| Discharge (m <sup>3</sup> /s) | 0.2 $\pm$ 0.1 <sup>a</sup> | 0.6 $\pm$ 0.2 <sup>b</sup> | 0.1 $\pm$ 0.1 <sup>a</sup>  | 0.5 $\pm$ 0.3 <sup>b</sup> | 0.1 $\pm$ 0.6 <sup>a</sup>  | 1.0 $\pm$ 0.6 <sup>b</sup> | 0.034* |

871

872 **Table 2:** Summary of generalized additive mixed models (GAMMs) used to determine the effect of the river system (region) and seasonality  
 873 (wet and dry seasons) livestock characteristics: time (minutes) spent at watering points, number of cattle per herd, percentage of cattle  
 874 defecating or urinating in the river. The 'full' model included the river or region (Amala, Nyangores and Talek), season (dry vs. wet) and river X  
 875 season interaction as fixed effects and watering point as a random effect.

| Fixed effects                           | Livestock characteristics at watering points |                           |                    |                   |
|-----------------------------------------|----------------------------------------------|---------------------------|--------------------|-------------------|
|                                         | Time spent watering (min)                    | Number of cattle per herd | Percent defecated  | Percent urinated  |
| Intercept (estimate (SE); t value)      | 1.93(0.31); 6.20***                          | 3.88(0.41); 9.56***       | 0.15(0.09); 1.64   | 0.15(0.11); 1.42  |
| River (Estimate (SE); t value)          | 0.06(0.13); 0.47                             | -1.01(0.17); -5.87***     | -0.01(0.04); -0.16 | 0.02(0.04); 0.49  |
| Season Estimate (SE); t value           | -0.11(0.21); -0.54                           | -0.06(0.20); -0.31        | 0.02(0.06); 0.34   | 0.004(0.07); 0.06 |
| River x Season (estimate (SE); t value) | 0.02(0.08); 0.22                             | 0.03(0.08); 0.33          | 0.01(0.02); 0.24   | 0.001(0.03); 0.02 |
| <b>Random effect</b>                    |                                              |                           |                    |                   |
| Watering point (intercept) SD           | 0.22                                         | 0.63                      | 0.06               | 0.05              |
| Residual SD                             | 0.72                                         | 0.70                      | 0.21               | 0.26              |
| Adjusted $R^2$                          | 0.004                                        | 0.20                      | 0.002              | -0.002            |
| Scale estimation                        | 0.52                                         | 0.48                      | 0.04               | 0.07              |

876 SE= standard error; SD = degrees of freedom; t = t-test value between the fitted and a null model. Significance: \* $p < 0.05$ , \*\* $p < 0.01$ , \*\*\* $p < 0.001$

877

878

**Table 3.** Mean ( $\pm$ SD) quality (C: N: P ratio) of cattle dung and urine and hippo dung in different regions in the Mara River basin, Kenya.

| Regions      | Cattle                       |                               |                             |             | Hippopotamus                   |                               |                            |             |
|--------------|------------------------------|-------------------------------|-----------------------------|-------------|--------------------------------|-------------------------------|----------------------------|-------------|
|              | C: N                         | C: P                          | N: P                        | C: N: P     | C: N                           | C: P                          | N: P                       | C: N: P     |
| <b>Dung</b>  |                              |                               |                             |             |                                |                               |                            |             |
| Nyangores    | 18.4 $\pm$ 3.9 <sup>a</sup>  | 97.5 $\pm$ 4.4 <sup>a</sup>   | 5.3 $\pm$ 0.6 <sup>a</sup>  | 97.5:5.3:1  | -                              | -                             | -                          | -           |
| Amala        | 21.7 $\pm$ 4.1 <sup>a</sup>  | 102.2 $\pm$ 5.2 <sup>a</sup>  | 4.7 $\pm$ 0.7 <sup>ab</sup> | 102.2:4.7:1 | -                              | -                             | -                          | -           |
| Middle Mara  | 24.9 $\pm$ 4.5 <sup>ab</sup> | 117.4 $\pm$ 2.3 <sup>ab</sup> | 4.7 $\pm$ 0.7 <sup>ab</sup> | 117.4:4.7:1 | 23.27 $\pm$ 3.72 <sup>b</sup>  | 263.7 $\pm$ 8.9 <sup>a</sup>  | 5.5 $\pm$ 0.9 <sup>a</sup> | 263.7:5.5:1 |
| MMNR         | 26.1 $\pm$ 3.7 <sup>b</sup>  | 127.2 $\pm$ 4.2 <sup>b</sup>  | 4.9 $\pm$ 0.5 <sup>ab</sup> | 127.2:4.9:1 | 34.27 $\pm$ 6.38 <sup>a</sup>  | 227.5 $\pm$ 12.6 <sup>a</sup> | 5.9 $\pm$ 0.9 <sup>a</sup> | 227.5:5.9:1 |
| Talek Region | 27.2 $\pm$ 4.9 <sup>b</sup>  | 122.3 $\pm$ 3.1 <sup>b</sup>  | 4.5 $\pm$ 0.4 <sup>b</sup>  | 122.3:4.5:1 | 33.30 $\pm$ 7.58 <sup>ab</sup> | 257.4 $\pm$ 10.2 <sup>a</sup> | 6.6 $\pm$ 0.7 <sup>a</sup> | 257.4:6.6:1 |
| F - value    | 3.69                         | 4.34                          | 2.68                        | -           | 2.54                           | 1.97                          | 1.42                       | -           |
| P - value    | 0.004                        | 0.01                          | 0.044                       | -           | 0.041                          | 0.088                         | 0.231                      | -           |
| <b>Urine</b> |                              |                               |                             |             |                                |                               |                            |             |
| Talek Region | 1.4 $\pm$ 0.06               | 36.0 $\pm$ 11.0               | 25.7 $\pm$ 7.3              | 33.2:23.9:1 | -                              | -                             | -                          | -           |

879

880

881 **Table 4.** Per capita loading rates for organic matter (OM), carbon (C), nitrogen (N) and  
 882 phosphorus (P) through egestion and excretion by cattle determined by the metabolism  
 883 model and direct method for the Mara River basin, Kenya. 95% confidence intervals for  
 884 cattle dung loading rates are provided in brackets.

| Loading rates by cattle                                    | Method of estimation |                    |
|------------------------------------------------------------|----------------------|--------------------|
|                                                            | Metabolism model     | Direct method      |
| <b>Cattle dung</b>                                         |                      |                    |
| OM (wet mass, (g cattle <sup>-1</sup> day <sup>-1</sup> )) | 99.6 (91.8-108.3)    | 107.7 (84.8-134.8) |
| C (g cattle <sup>-1</sup> day <sup>-1</sup> )              | 8.4 (7.7-9.1)        | 9.02 (6.6-12.1)    |
| N (g cattle <sup>-1</sup> day <sup>-1</sup> )              | 0.4 (0.3-0.4)        | 0.4 (0.4-0.6)      |
| P (g cattle <sup>-1</sup> day <sup>-1</sup> )              | 0.07 (0.07-0.09)     | 0.08 (0.07-0.11)   |
| <b>Cattle urine</b>                                        |                      |                    |
| C (g cattle <sup>-1</sup> day <sup>-1</sup> )              | 7.6 (6.6-9.6)        | 12.8 (8.7-18.3)    |
| N (g cattle <sup>-1</sup> day <sup>-1</sup> )              | 5.5 (4.7-7.1)        | 9.2 (6.3-13.5)     |
| P (g cattle <sup>-1</sup> day <sup>-1</sup> )              | 0.23 (0.16-0.31)     | 0.39 (0.21-0.66)   |
| <b>Total egestion and excretion</b>                        |                      |                    |
| OM (wet mass, (g cattle <sup>-1</sup> day <sup>-1</sup> )) | 99.6                 | 107.7              |
| C (g cattle <sup>-1</sup> day <sup>-1</sup> )              | 16.0                 | 21.8               |
| N (g cattle <sup>-1</sup> day <sup>-1</sup> )              | 5.9                  | 9.6                |
| P (g cattle <sup>-1</sup> day <sup>-1</sup> )              | 0.3                  | 0.5                |

885

886

887 **Table 5.** Median loading rates of organic matter (dung) and nutrients (C, N and P) by cattle in the Mara River basin based on the metabolism  
 888 model in comparison with published loading rates for hippopotamus. Cattle numbers outside the reserve area for the Koyake Group Ranch,  
 889 while numbers for the Talek River represent all other Group Ranches, estimated from a conservative number of 100,000 cattle in the group  
 890 ranches outside the MMNR. <sup>Y</sup>Published hippopotamus loading rates are from (4).

| <b>Cattle and hippo populations and loading numbers</b>                                      | <b>Nyangores</b> | <b>Amala</b> | <b>Middle Mara</b> | <b>Talek Region</b> | <b>MMNR</b> |
|----------------------------------------------------------------------------------------------|------------------|--------------|--------------------|---------------------|-------------|
| Cattle numbers                                                                               | 16285            | 21581        | 30,000             | 85,000              | 13,350      |
| <b>Cattle dung</b>                                                                           |                  |              |                    |                     |             |
| Loading by cattle population (OM wet mass kg day <sup>-1</sup> )                             | 1410.9           | 1869.8       | 2599.2             | 7364.4              | 1156.6      |
| Loading by cattle population (C in kg day <sup>-1</sup> )                                    | 105.7            | 138.5        | 224.5              | 669.1               | 109.2       |
| Loading by cattle population (N in kg day <sup>-1</sup> )                                    | 7.3              | 6.3          | 8.8                | 24.9                | 3.8         |
| Loading by cattle population (P in kg day <sup>-1</sup> )                                    | 1.1              | 1.5          | 1.9                | 5.1                 | 0.8         |
| <b>Cattle Urine</b>                                                                          |                  |              |                    |                     |             |
| Loading by cattle population (C in kg day <sup>-1</sup> )                                    | 107.1            | 142.0        | 197.4              | 559.2               | 87.8        |
| Loading by cattle population (N in kg day <sup>-1</sup> )                                    | 77.3             | 102.5        | 142.5              | 403.7               | 63.4        |
| Loading by cattle population (P in kg day <sup>-1</sup> )                                    | 3.2              | 4.3          | 6.0                | 16.9                | 2.6         |
| <b>Total egestion and excretion</b>                                                          |                  |              |                    |                     |             |
| Total loading by cattle population OM (wet mass, (g cattle <sup>-1</sup> day <sup>-1</sup> ) | 1410.9           | 1869.8       | 2599.2             | 7364.4              | 1156.6      |
| Total loading by cattle population C (g cattle <sup>-1</sup> day <sup>-1</sup> )             | 212.9            | 280.5        | 421.8              | 1228.3              | 197.0       |
| Total loading by cattle population N (g cattle <sup>-1</sup> day <sup>-1</sup> )             | 84.7             | 108.8        | 151.3              | 428.6               | 67.2        |
| Total loading by cattle population P (g cattle <sup>-1</sup> day <sup>-1</sup> )             | 4.4              | 5.8          | 7.9                | 22.0                | 3.5         |
| <b>Total loading by hippopotamus population</b>                                              |                  |              |                    |                     |             |
| Hippopotamus numbers                                                                         | -                | -            | 1,571              | 648                 | 1,924       |
| OM (wet mass in kg day <sup>-1</sup> ) <sup>Y</sup>                                          | -                | -            | 13,668             | 5,638               | 16,739      |
| C (g hippopotamus <sup>-1</sup> day <sup>-1</sup> )                                          | -                | -            | 1,327              | 547                 | 1,625       |
| N (g hippopotamus <sup>-1</sup> day <sup>-1</sup> )                                          | -                | -            | 187                | 77                  | 228         |
| P (g hippopotamus <sup>-1</sup> day <sup>-1</sup> )                                          | -                | -            | 18                 | 8                   | 22          |

891



892 **Table 6:** Mean ( $\pm$ SD) variation in water quality variables and nutrient concentrations in the water column and sediments at the upstream and  
 893 downstream river reaches of livestock watering sites in the Talek River, a tributary of the Mara River.  
 894

| Variable                                                  | Sample       | Upstream Location | Downstream Location | Paired t-value | p - value        |
|-----------------------------------------------------------|--------------|-------------------|---------------------|----------------|------------------|
| Temperature ( $^{\circ}$ C)                               | water column | 25.2 $\pm$ 0.4    | 25.4 $\pm$ 0.4      | 0.27           | 0.787            |
| Dissolved oxygen ( $\text{mg L}^{-1}$ )                   | water column | 6.8 $\pm$ 0.1     | 6.5 $\pm$ 0.1       | 1.89           | 0.061            |
| Electrical conductivity ( $\mu\text{S cm}^{-1}$ )         | water column | 711.0 $\pm$ 49.0  | 753.0 $\pm$ 46.0    | 0.63           | 0.532            |
| pH (units)                                                | water column | 6.0 $\pm$ 0.07    | 6.1 $\pm$ 0.1       | 1.52           | 0.130            |
| Total suspended solids ( $\text{mg L}^{-1}$ )             | water column | 62.0 $\pm$ 7.9    | 113.4 $\pm$ 14.0    | 3.22           | <b>0.003</b>     |
| Particulate organic matter as AFDM ( $\text{mg L}^{-1}$ ) | water column | 13.3 $\pm$ 1.5    | 26.7 $\pm$ 3.5      | 3.49           | <b>0.001</b>     |
| Chl- <i>a</i> ( $\mu\text{g L}^{-1}$ )                    | water column | 6.6 $\pm$ 1.4     | 8.5 $\pm$ 1.0       | 1.07           | 0.307            |
| Chl- <i>a</i> ( $\mu\text{g cm}^{-2}$ )                   | benthic      | 0.3 $\pm$ 0.1     | 0.4 $\pm$ 0.1       | 0.95           | 0.348            |
| TN ( $\text{mgL}^{-1}$ )                                  | water column | 3.3 $\pm$ 0.1     | 4.8 $\pm$ 0.2       | 5.50           | <b>&lt;0.001</b> |
| TDN ( $\text{mgL}^{-1}$ )                                 | water column | 1.2 $\pm$ 0.1     | 1.9 $\pm$ 0.2       | 3.68           | <b>0.001</b>     |
| NO <sub>3</sub> ( $\text{mgL}^{-1}$ )                     | water column | 0.18 $\pm$ 0.02   | 0.016 $\pm$ 0.02    | 0.50           | 0.621            |
| NH <sub>4</sub> ( $\text{mgL}^{-1}$ )                     | water column | 0.18 $\pm$ 0.03   | 0.23 $\pm$ 0.04     | 1.42           | 0.159            |
| TP ( $\text{mgL}^{-1}$ )                                  | water column | 0.52 $\pm$ 0.03   | 0.59 $\pm$ 0.03     | 1.81           | 0.074            |
| SRP ( $\text{mgL}^{-1}$ )                                 | water column | 190.2 $\pm$ 1.1   | 220.3 $\pm$ 1.6     | 1.04           | 0.303            |
| DOC ( $\text{mgL}^{-1}$ )                                 | water column | 7.6 $\pm$ 0.7     | 9.2 $\pm$ 0.7       | 1.58           | 0.123            |
| TN ( $\text{mgg}^{-1}$ )                                  | Sediments    | 7.6 $\pm$ 0.2     | 9.0 $\pm$ 0.2       | 5.65           | <b>&lt;0.001</b> |
| NO <sub>3</sub> <sup>-2</sup> ( $\text{mgg}^{-1}$ )       | Sediments    | 2.8 $\pm$ 0.3     | 4.5 $\pm$ 0.3       | 3.70           | <b>0.001</b>     |
| NH <sub>4</sub> ( $\text{mgg}^{-1}$ )                     | Sediments    | 0.7 $\pm$ 0.03    | 1.1 $\pm$ 0.1       | 4.08           | <b>&lt;0.001</b> |
| TP ( $\text{mgg}^{-1}$ )                                  | Sediments    | 9.2 $\pm$ 0.3     | 11.0 $\pm$ 0.1      | 6.28           | <b>&lt;0.001</b> |
| Inorganic-P ( $\text{mgg}^{-1}$ )                         | Sediments    | 0.8 $\pm$ 0.1     | 1.0 $\pm$ 0.04      | 3.26           | <b>0.003</b>     |

895

896

Figure 1

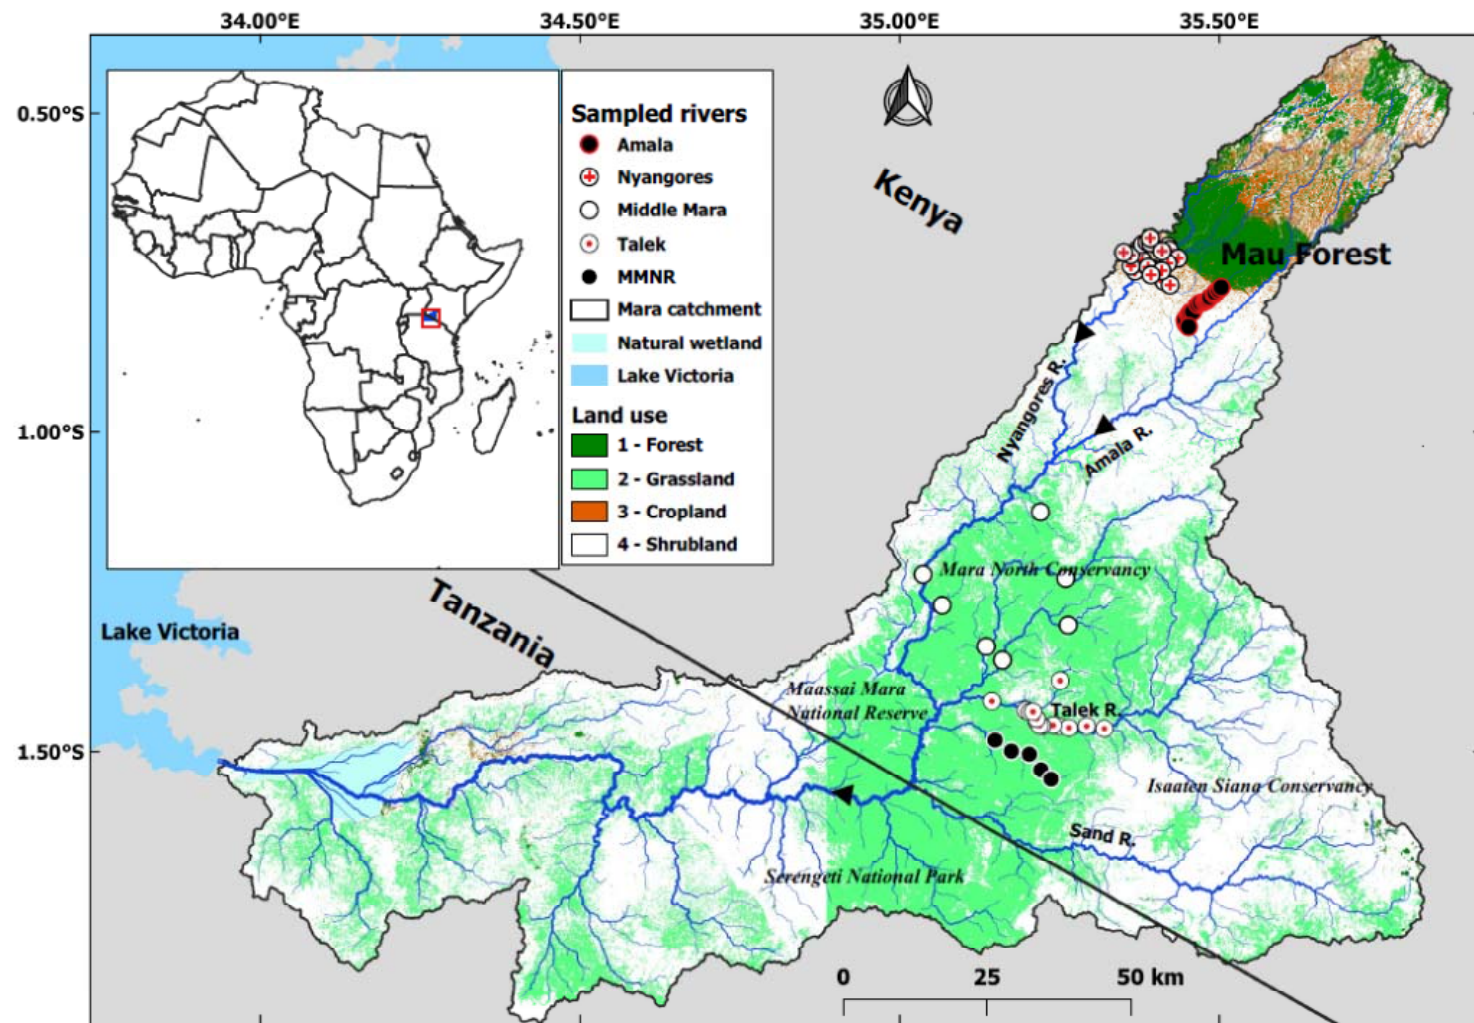

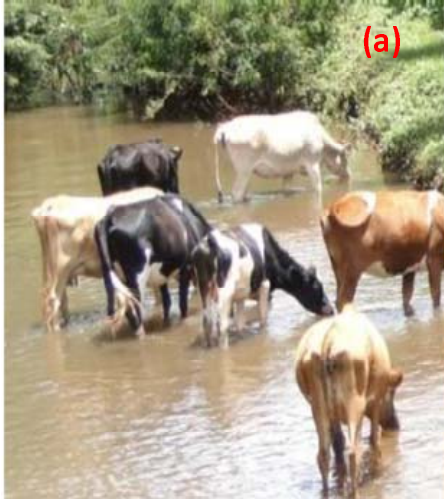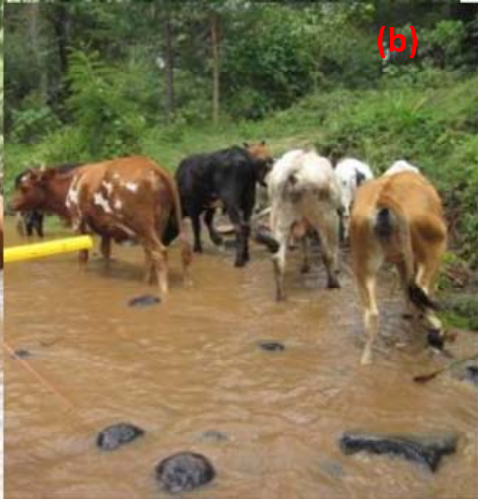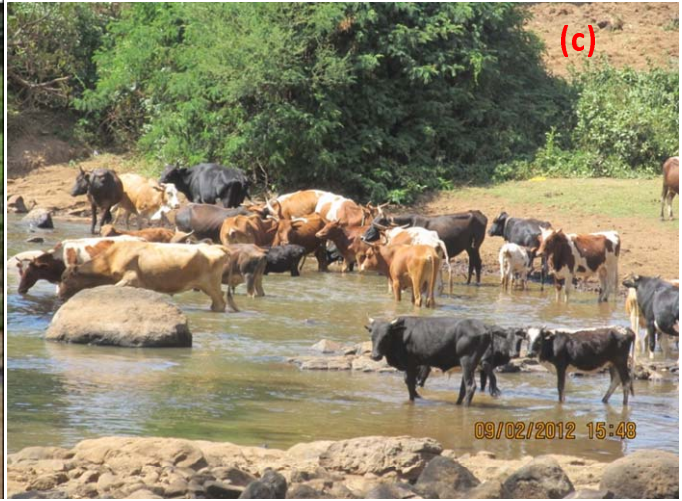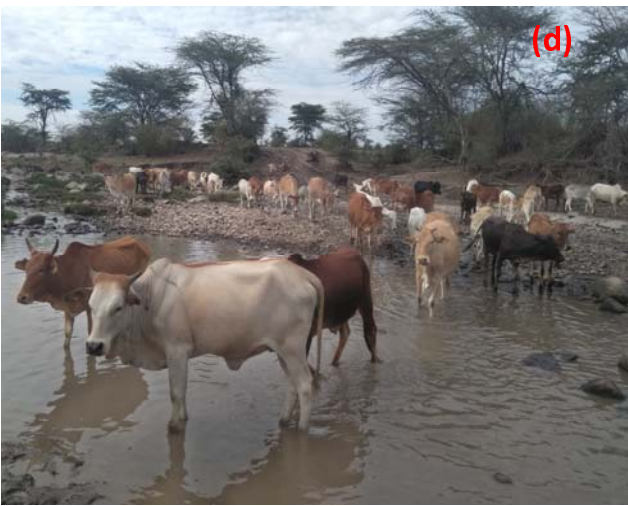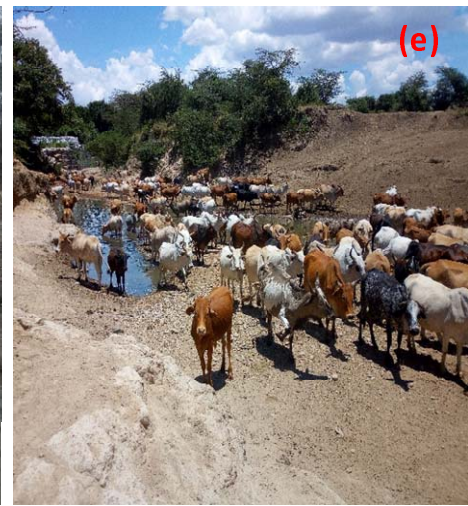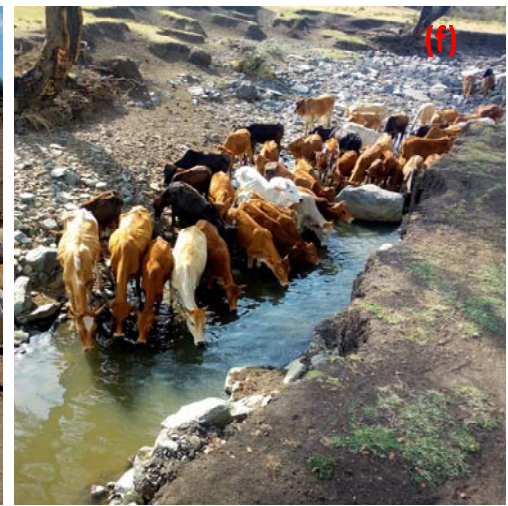

Figure 3

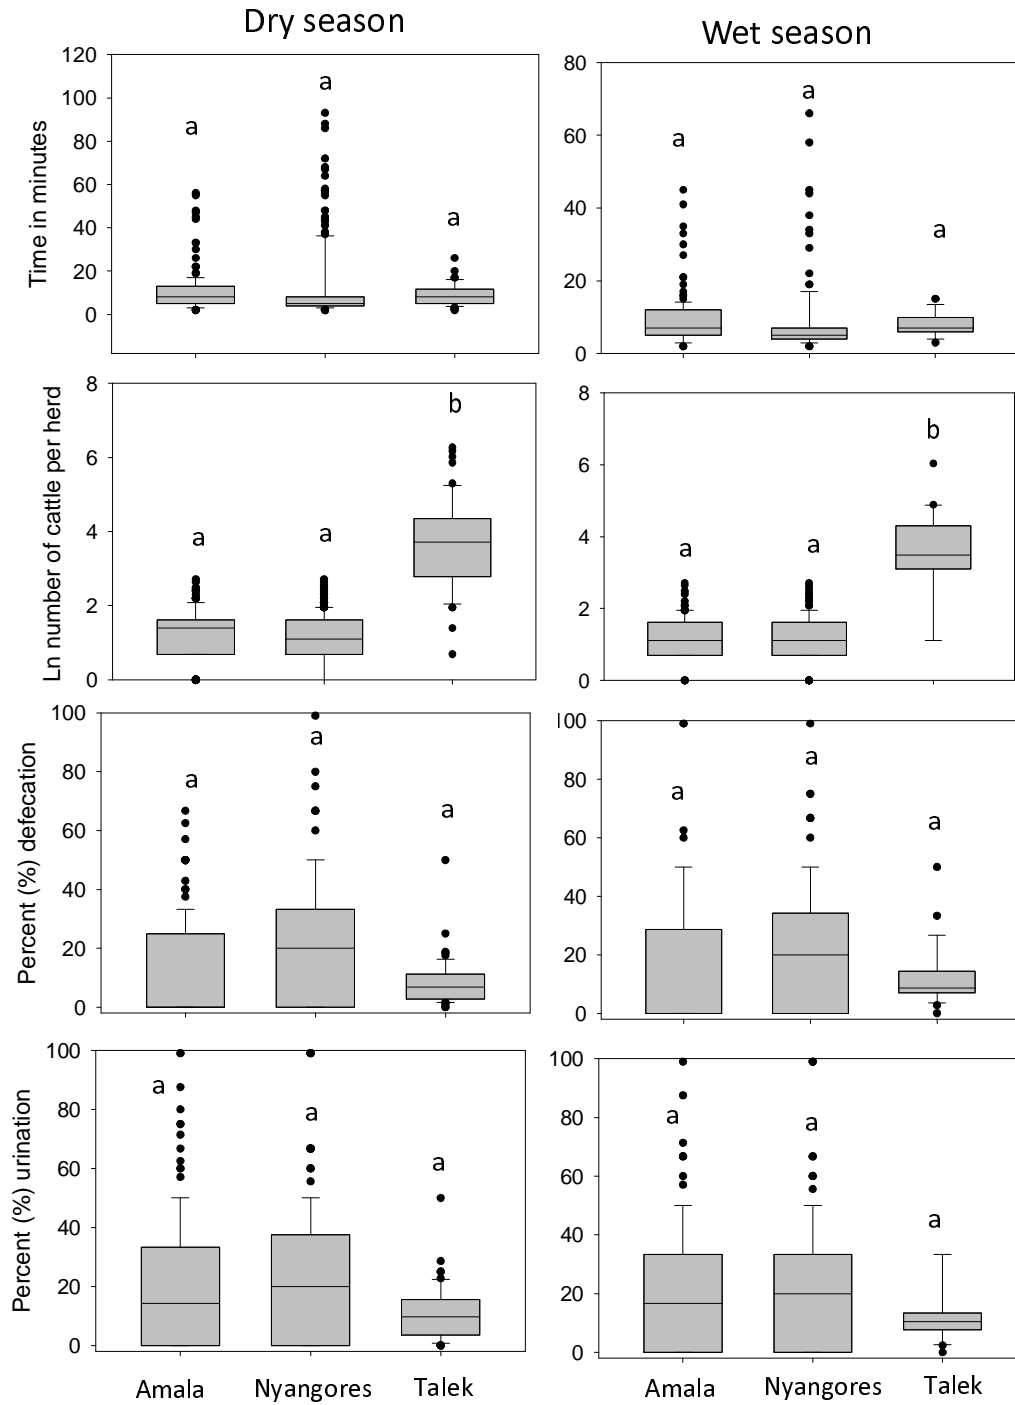

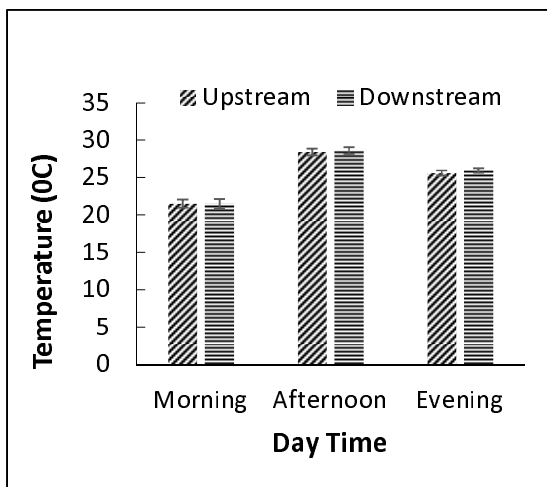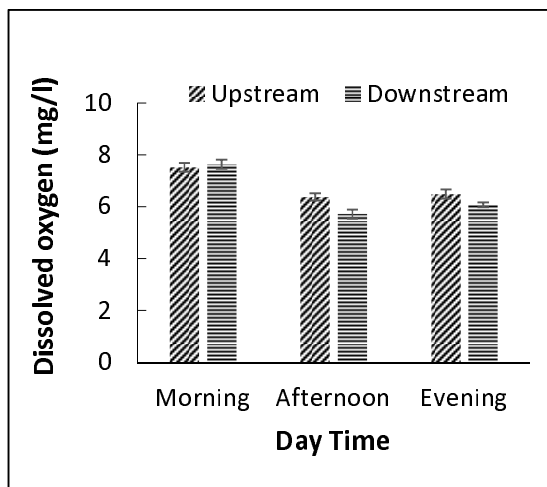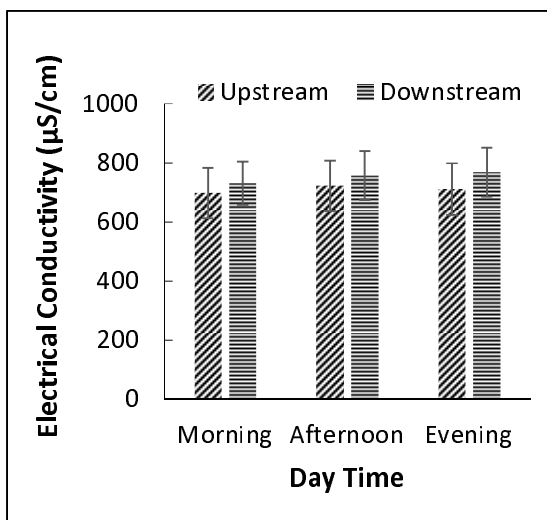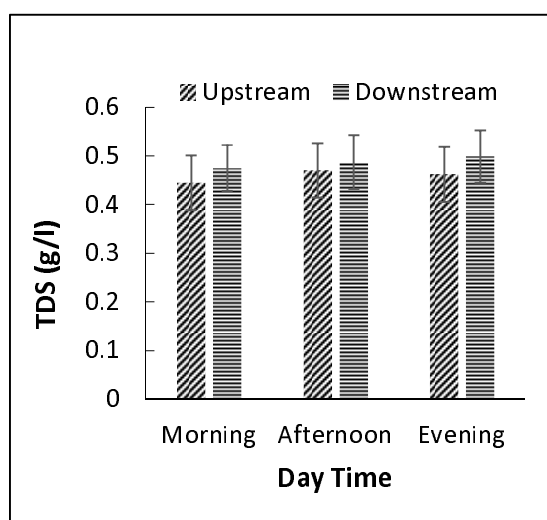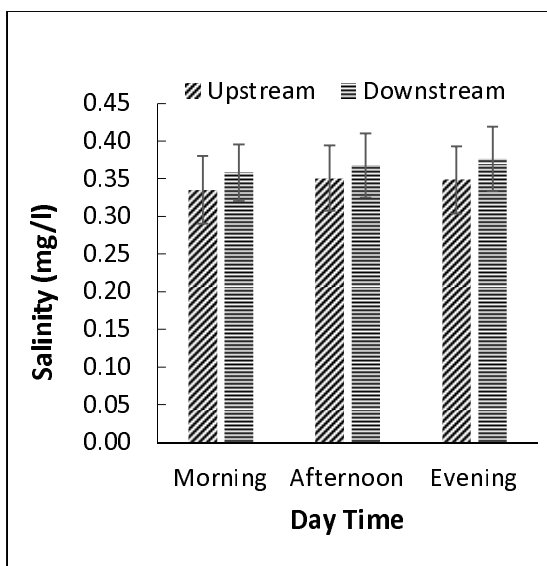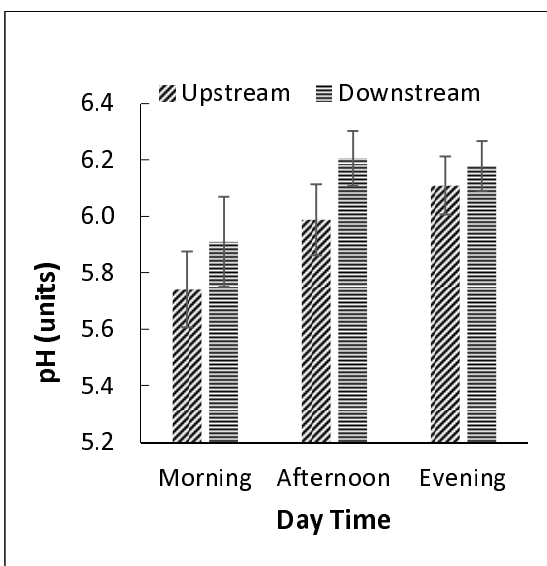

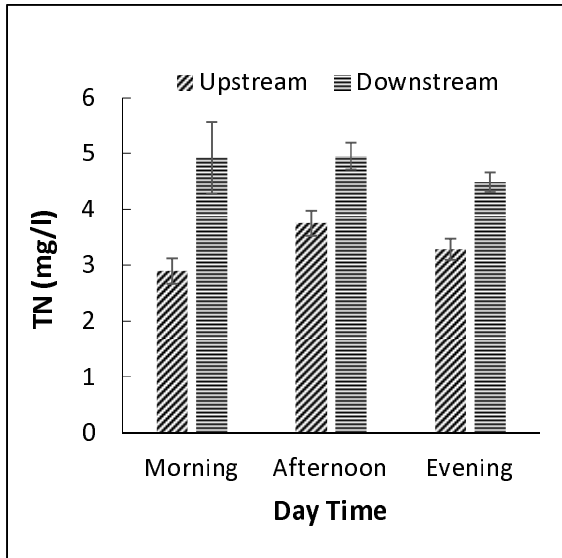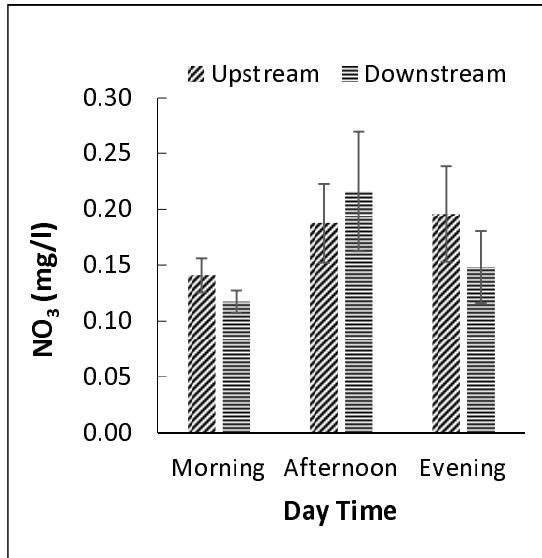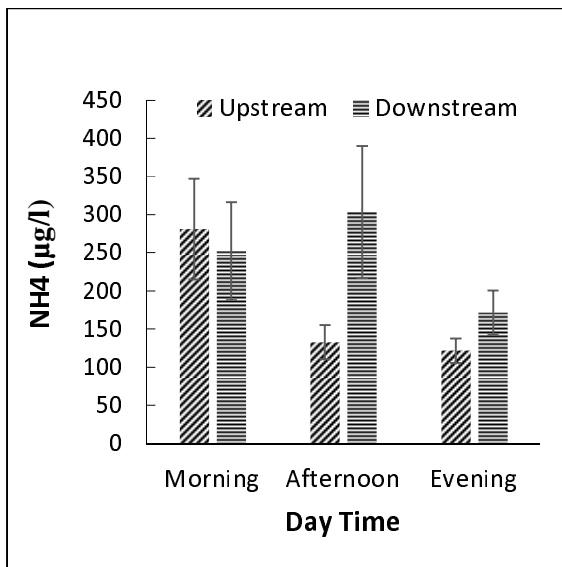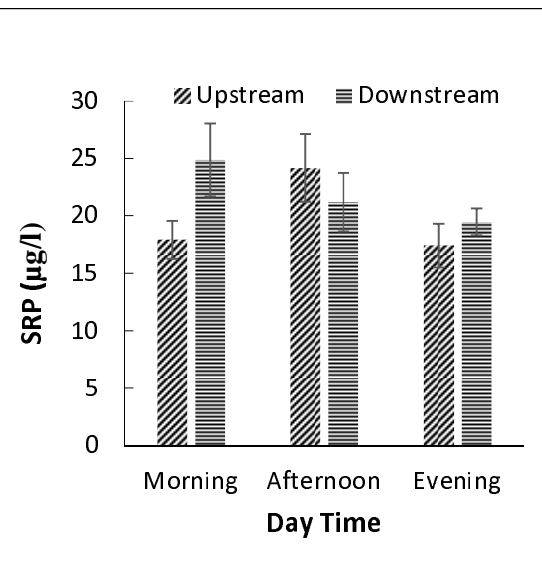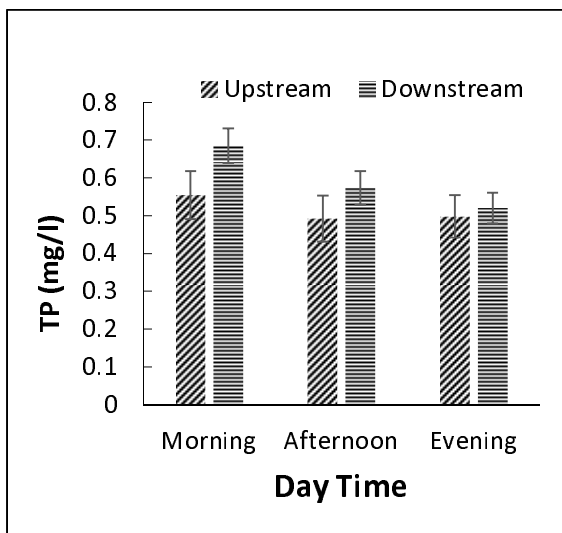

Source: http://biorxiv.org/content/10.1101/2021.07.13.452213v1.full.pdf
